# Supplementary material for: A neutral analogue of a phosphamethine cyanine
Source: Royal Society of Chemistry journal article supplement (doi:10.1039/d2dt00837h), 2022-01-01
Supplement: d2dt00837h1.pdf [file d2dt00837h1.pdf]

## Supplementary information

### *A neutral analogue of a phosphamethine cyanine*

Mario Cicač-Hudi,<sup>a</sup> Manuel Kaaz,<sup>a</sup> Nicholas Birchall,<sup>a</sup> Martin Nieger<sup>b</sup> and Dietrich Gudat<sup>\*a</sup>

<sup>a</sup> Institute of Inorganic Chemistry, University of Stuttgart, Stuttgart, Germany

<sup>b</sup> Department of Chemistry, University of Helsinki, University of Helsinki, Finland.

E-Mail: [dietrich.gudat@iac.uni-stuttgart.de](mailto:dietrich.gudat@iac.uni-stuttgart.de)

### Table of contents

|                          |       |
|--------------------------|-------|
| Experimental Procedures  | p. 2  |
| Crystallographic Studies | p. 2  |
| NMR Spectra              | p. 5  |
| Computational Studies    | p. 8  |
| References               | p. 19 |

## General conditions

Unless otherwise stated, all manipulations were carried out under an inert atmosphere of purified argon or nitrogen, either using flame-dried glassware and standard Schlenk techniques, or in gloveboxes. *n*-Pentane and CH<sub>3</sub>CN were distilled from NaK alloy and CaH<sub>2</sub>, respectively, and stored in Schlenk-flasks under inert conditions. C<sub>6</sub>D<sub>6</sub> was refluxed over NaK alloy for 72 h, followed by distillation and storage over molecular sieves in a glovebox. Reaction monitoring experiments were carried out using NMR-tubes with a PTFE screw. Imidazolio-phosphide **1** and borane **2** were prepared as described.<sup>1,2</sup>

NMR spectra were acquired on Bruker Avance 250 (<sup>1</sup>H: 250.0 MHz, <sup>11</sup>B: 80.3 MHz, <sup>13</sup>C: 62.9 MHz, <sup>31</sup>P: 101.2 MHz) or Bruker Avance 400 (<sup>1</sup>H: 400.1 MHz, <sup>15</sup>N 40.6: MHz) NMR spectrometers at 293 - 296 K if not stated otherwise. <sup>1</sup>H Chemical shifts were referenced to TMS using the signals of the residual protons of the deuterated solvent ( $\delta^1\text{H} = 7.15$  (C<sub>6</sub>D<sub>6</sub>)) as secondary reference. Spectra of heteronuclei were referenced using the  $\Xi$ -scale<sup>3</sup> using BF<sub>3</sub>·OEt<sub>2</sub> ( $\Xi = 32.083974$  MHz, <sup>11</sup>B), TMS ( $\Xi = 25.145020$  MHz, <sup>13</sup>C), MeNO<sub>2</sub> ( $\Xi = 10.136767$  MHz, <sup>15</sup>N) and 85 % H<sub>3</sub>PO<sub>4</sub> ( $\Xi = 40.480747$  MHz, <sup>31</sup>P) as secondary references. Coupling constants are generally given as absolute values. Assignments of <sup>1</sup>H, <sup>13</sup>C, and <sup>15</sup>N NMR signals were derived from <sup>1</sup>H, <sup>13</sup>C and <sup>1</sup>H, <sup>15</sup>N HMBC NMR spectra. FTIR-spectra were recorded on a Thermo Scientific Nicolet iS5 spectrometer equipped with an iD5 attenuated total reflectance (ATR) unit under nitrogen atmosphere. Elemental analyses were performed with an Elemental Micro Cube elemental analyser. Mass spectra were obtained using a Varian MAT 711 (EI at 70 eV) mass spectrometer.

## Synthesis of **3**

A 100 mL Schlenk flask equipped with a dropping funnel and a gas release tube was charged with **1** (1.00 g, 7.81 mmol, 1.0 equiv.), sodium hydride (190 mg, 9.37 mmol, 1.2 equiv.) and MeCN (10 mL). A solution of **2** (5.46 g, 11.7 mmol, 1.5 equiv.) in MeCN (10 mL) was slowly added to the constantly stirred suspension through the dropping funnel. Stirring was continued after the addition was complete until the gas evolution ceased and formation of an orange-coloured solution and a colourless precipitate had formed. Volatiles were then removed under reduced pressure and the residue extracted with *n*-pentane (15 mL). The resulting suspension was filtered over a G4-frit and the residual solid washed with pentane (2 x 5 mL). The combined filtrates were concentrated under reduced pressure to about half the original volume. Storage of the resulting solution at -30 °C afforded crystalline **3** (3.16 g, 6.14 mmol, yield 78%) as dark red needles.

<sup>1</sup>H NMR (C<sub>6</sub>D<sub>6</sub>, 250 MHz):  $\delta = 7.25 - 7.05$  (m, 6 H, *m/p*-CH), 6.37 (d, <sup>4</sup>*J*<sub>PH</sub> = 0.9 Hz, 2 H, NHB-CH), 5.49 (s, 2 H, imid-CH), 3.63 (sept, 4 H, <sup>3</sup>*J*<sub>HH</sub> = 6.83 Hz, *iPr*-CH), 3.03 (s, 6 H, NCH<sub>3</sub>), 1.41 (d, 12 H, <sup>3</sup>*J*<sub>HH</sub> = 6.83 Hz, CH<sub>3</sub>), 1.25 (d, 12 H, <sup>3</sup>*J*<sub>HH</sub> = 6.8 Hz, CH<sub>3</sub>). – <sup>11</sup>B (C<sub>6</sub>D<sub>6</sub>):  $\delta = 32.3$  (broad s, *w*<sub>1/2</sub> ≈ 2.8·10<sup>2</sup> Hz). – <sup>13</sup>C{<sup>1</sup>H} NMR (C<sub>6</sub>D<sub>6</sub>):  $\delta = 170.5$  (d, <sup>1</sup>*J*<sub>CP</sub> = 94 Hz, CP), 146.4 (s, *o*-C), 140.9 (s, *ipso*-C), 126.4 (s, *p*-C), 123.0 (s, *m*-C), 119.9 (d, <sup>4</sup>*J*<sub>PC</sub> = 0.9 Hz, NHB-CH), 118.0 (d, <sup>3</sup>*J*<sub>PC</sub> = 2.8 Hz, imid-CH), 36.4 (d, <sup>3</sup>*J*<sub>PC</sub> = 7.8 Hz, NCH<sub>3</sub>), 28.3 (d, <sup>4</sup>*J*<sub>PC</sub> = 1.9 Hz, *iPr*-CH), 25.8 (s, CH<sub>3</sub>), 23.3 (d, <sup>5</sup>*J*<sub>PC</sub> = 2.5 Hz, CH<sub>3</sub>). – <sup>15</sup>N NMR (HMBC, C<sub>6</sub>D<sub>6</sub>, 400 MHz):  $\delta = -215.2$  (s, imid-N), -241.0 (s, NHB-N). – <sup>31</sup>P{<sup>1</sup>H} NMR (C<sub>6</sub>D<sub>6</sub>):  $\delta = -176.6$  (broad s, *w*<sub>1/2</sub> ≈ 52 Hz). – ATR-IR:  $\tilde{\nu}/\text{cm}^{-1} = 3066$  (w), 3032 (w), 2959 (m), 2927 (w), 2868 (m), 1571 (w), 1457 (br), 1383 (br), 1361 (m), 1328 (w), 1296 (w), 1273 (w), 1254 (w), 1223 (s), 1178 (m), 1051 (m), 979 (w), 934 (w), 907 (w), 884 (w), 803 (m), 757 (vs), 708 (m), 691 (w), 654 (m), 619 (m). – HRMS (EI, 70 eV): *m/e* = 514.3396 (M<sup>+</sup>, calcd. 514.3402 for [C<sub>31</sub>H<sub>44</sub>BN<sub>4</sub>P]<sup>+</sup>). – C<sub>31</sub>H<sub>44</sub>BN<sub>4</sub>P (516.7 g mol<sup>-1</sup>): calcd. C 72.37 H 8.62 N 10.89, found C 71.81 H 8.62 N 10.52.

## Crystallographic studies

X-ray diffraction data for **3** were collected on a Bruker diffractometer equipped with a Kappa Apex II Duo CCD-detector and a KRYO-FLEX cooling device with Mo-*K*<sub>α</sub> radiation ( $\lambda = 0.71073$  Å) at 135(2) K. The structure was solved with direct methods (SHELXS-2014<sup>4</sup>) and refined with a full-matrix least squares scheme on *F*<sup>2</sup> (SHELXL-2014<sup>4</sup>). A semi-empirical absorption correction was applied. One *iPr*-moiety and the P-imidazole fragment were disordered. Constraints (EADP), restraints (SADI, FLAT), and a general RIGU restraint were used for the refinement. Occupancy factors were determined from free refinement at the isotropic stage and then fixed. Disordered C- and N-atoms were refined isotropically. All other non-hydrogen atoms were refined anisotropically and hydrogen atoms using a riding model. CCDC-2133603 (see Table S1 and cif-file for further details) contains the crystallographic data for this paper, which can be obtained free of charge from the Cambridge Crystallographic Data Centre via [www.ccdc.cam.ac.uk/data\\_request/cif](http://www.ccdc.cam.ac.uk/data_request/cif).

**Table S1.** Crystallographic data for **3**.

|                                                   | <b>3</b>                                          |
|---------------------------------------------------|---------------------------------------------------|
| CSD                                               | 2133603                                           |
| sum formula                                       | C <sub>31</sub> H <sub>44</sub> BN <sub>4</sub> P |
| <i>M</i> / g mol <sup>-1</sup>                    | 514.48                                            |
| <i>T</i>                                          | 135(2)                                            |
| radiation                                         | Mo-K <sub>α</sub>                                 |
| wavelength                                        | 0.71073 Å                                         |
| crystal system                                    | Monoclinic                                        |
| space group                                       | P2 <sub>1</sub> /c                                |
| <i>a</i> / Å                                      | 13.1468(5)                                        |
| <i>b</i> / Å                                      | 12.2571(5)                                        |
| <i>c</i> / Å                                      | 19.3695(7)                                        |
| $\alpha$ / °                                      | 90                                                |
| $\beta$ / °                                       | 101.993(2)                                        |
| $\gamma$ / °                                      | 90                                                |
| <i>V</i> / Å <sup>3</sup>                         | 3053.1(2)                                         |
| <i>Z</i>                                          | 4                                                 |
| $\rho_{\text{calcd}}$ / g cm <sup>-3</sup>        | 1.119                                             |
| <i>F</i> (000)                                    | 1112                                              |
| crystal size / mm <sup>3</sup>                    | 0.306 x 0.215 x 0.209                             |
| $\Theta$ -range / °                               | 1.583 to 26.417                                   |
| $\mu_{\text{abs}}$ / mm <sup>-1</sup>             | 0.115                                             |
| Refl. Collected                                   | 24668                                             |
| Refl. Unique                                      | 6277                                              |
| Refl. Obsd. ( <i>I</i> > 2 $\sigma$ ( <i>I</i> )) | 3686                                              |
| <i>R</i> <sub>int.</sub>                          | 0.0495                                            |
| Compl. to $\Theta = 25.242^\circ$ a)              | 1.000                                             |
| Absorp. corr.                                     | Multi-scan                                        |
| Max. / min. transm.                               | 0.6233 / 0.3662                                   |
| Data/restraints/parameters                        | 6277 / 312 / 329                                  |
| GoF ( <i>F</i> <sup>2</sup> )                     | 1.026                                             |
| <i>R</i> [ <i>I</i> > 2 $\sigma$ ( <i>I</i> )]    | 0.0674                                            |
| w <i>R</i> 2 (all data)                           | 0.1849                                            |
| Largest diff. peak and hole/e Å <sup>-3</sup>     | 0.550 / -0.424                                    |

a)  $\Theta$ -full range according to the IUCr-rules.

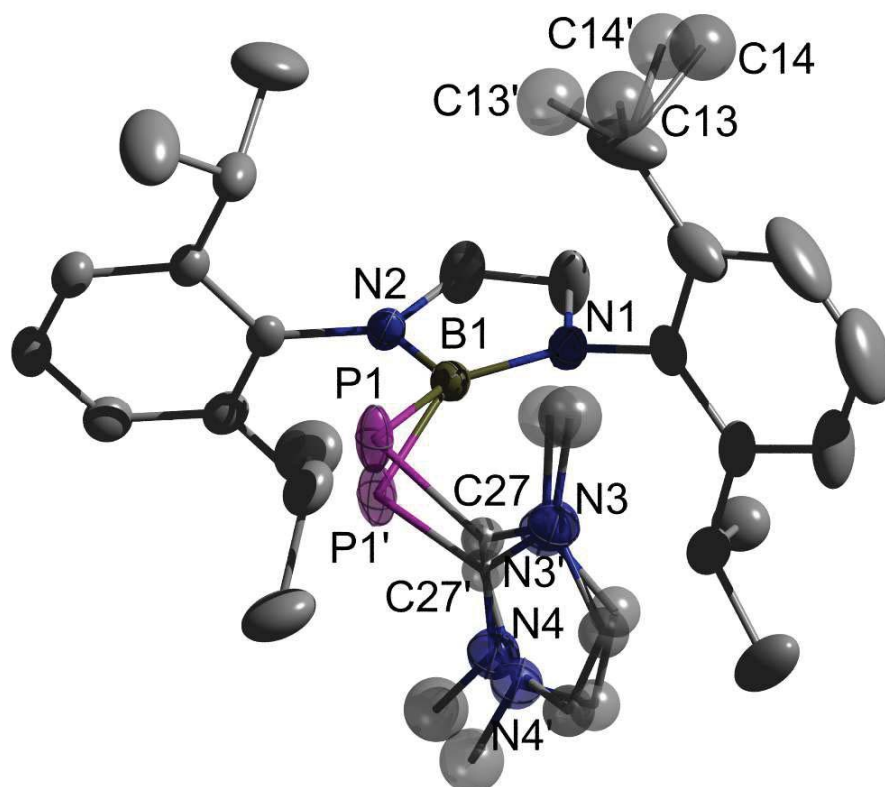

**Figure S1.** Representation of the molecular structure of **3** showing the positions of the disordered atoms. Occupancy factors are 0.56/0.44 for atoms labelled as X and X', respectively. Hydrogen atoms were omitted for clarity. Thermal ellipsoids were drawn at the 50% probability level.

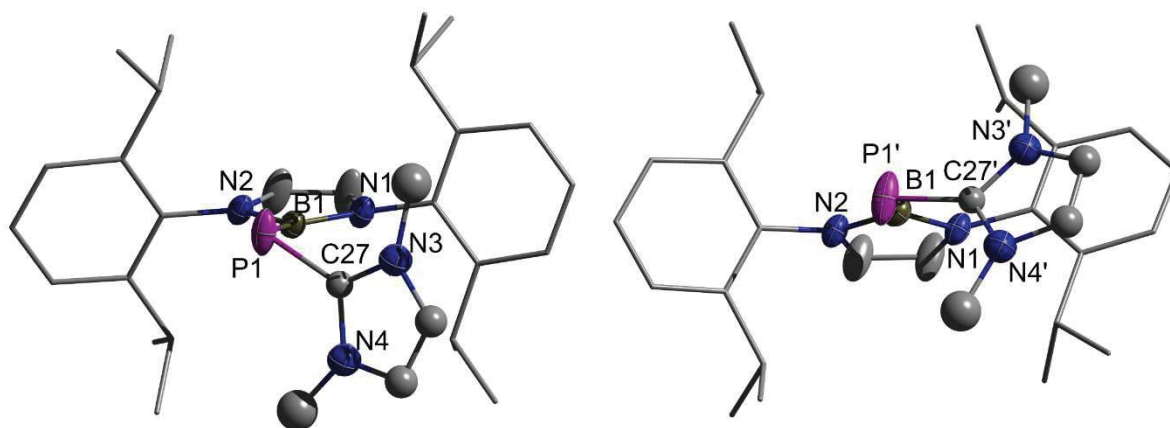

**Figure S2.** Separate representation of the major (left, occupancy 0.56) and minor (right, occupancy 0.44) conformer of **3** (occupancy factors 0.56/0.44). For clarity, hydrogen atoms were omitted and N-Dip substituents represented using a wire model. Thermal ellipsoids were drawn at the 50% probability level. Selected distances (Å) and angles (°): N1–B1 1.442(3), N2–B1 1.437(4), B1–P1 1.892(3), P1–C27 1.823(4), C27–N3 1.367(5), C27–N4 1.380(5), B1–P1' 1.892(4), P1'–C27' 1.776(5), C27'–N3' 1.360(6), C27'–N4' 1.370(6), N2–B1–N1 103.5(2), N2–B1–P1 120.9(2), N1–B1–P1 133.8(2), C27–P1–B1 100.78(19), N3–C27–N4 104.7(4), N3–C27–P1 127.9(3), N4–C27–P1 126.2(3), N2–B1–P1' 118.0(2), N1–B1–P1' 136.0(2), C27'–P1'–B1 108.7(2), N3'–C27'–N4' 101.0(4), N3'–C27'–P1' 127.9(4), N4'–C27'–P1' 130.7(4), N1–B1–P1–C27 -40.0(3), N1–B1–P1'–C27' 6.0(4).

## NMR spectra

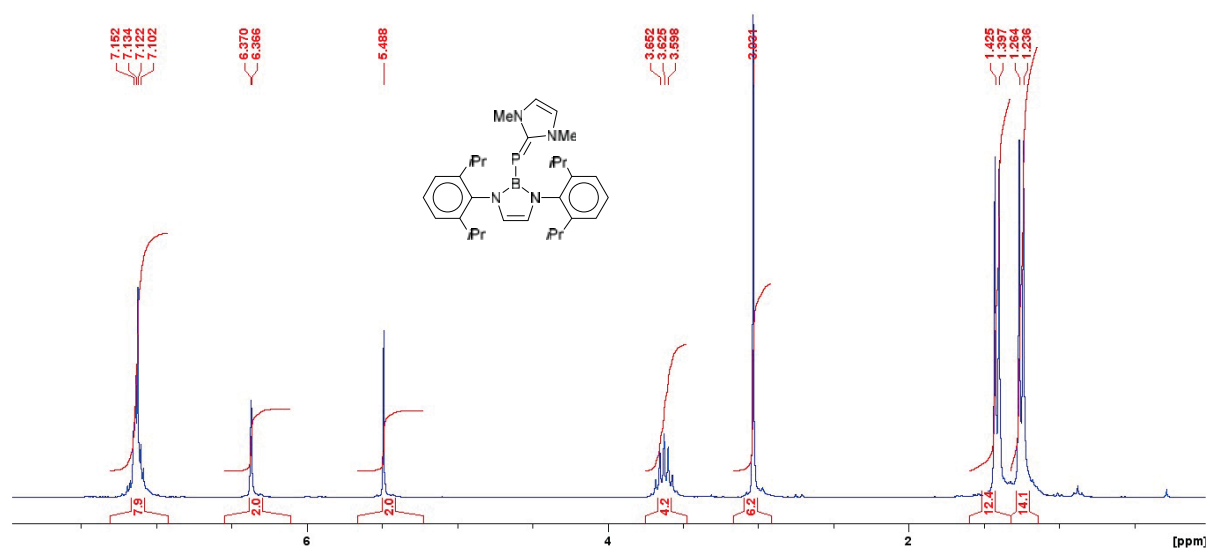

Figure S3.  $^1\text{H}$  NMR spectrum ( $\text{C}_6\text{D}_6$ , 250 MHz, 296 K) of **3**.

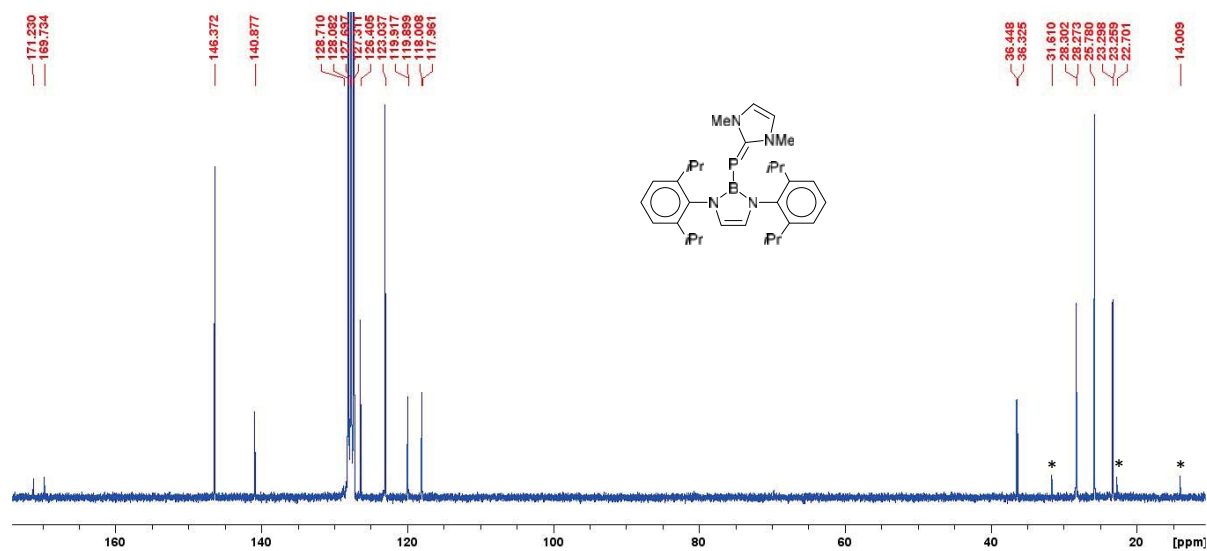

Figure S4.  $^{13}\text{C}\{^1\text{H}\}$  NMR spectrum ( $\text{C}_6\text{D}_6$ , 62.9 MHz, 296 K) of **3**. (\* denotes residual solvent signals (pentane)).

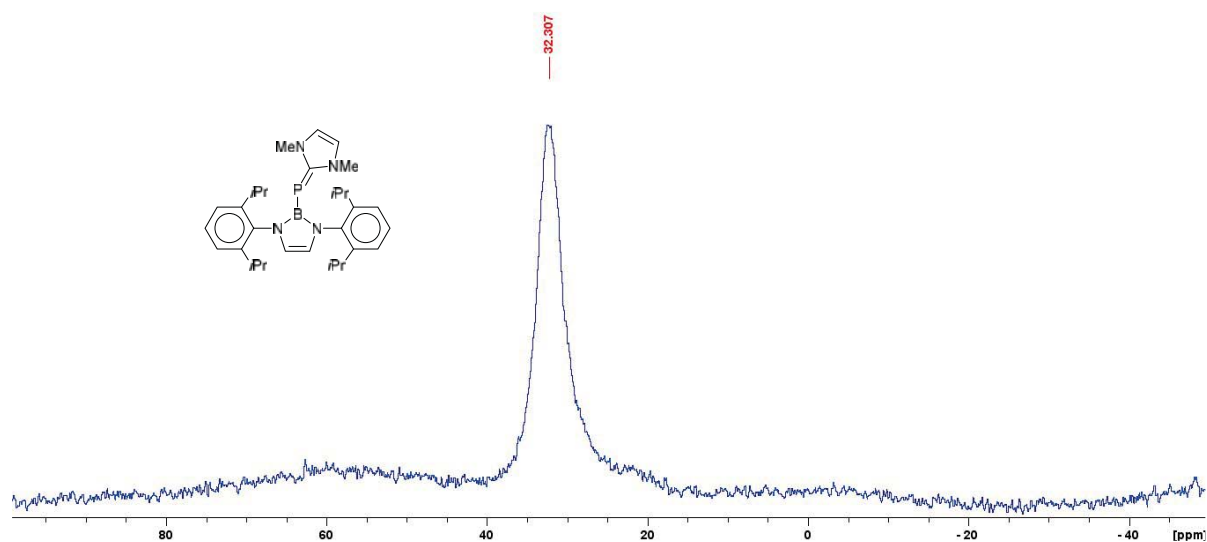

Figure S5.  $^{11}\text{B}\{^1\text{H}\}$  NMR spectrum ( $\text{C}_6\text{D}_6$ , 80.9 MHz, 296 K) of **3** (uncorrected for probe background).

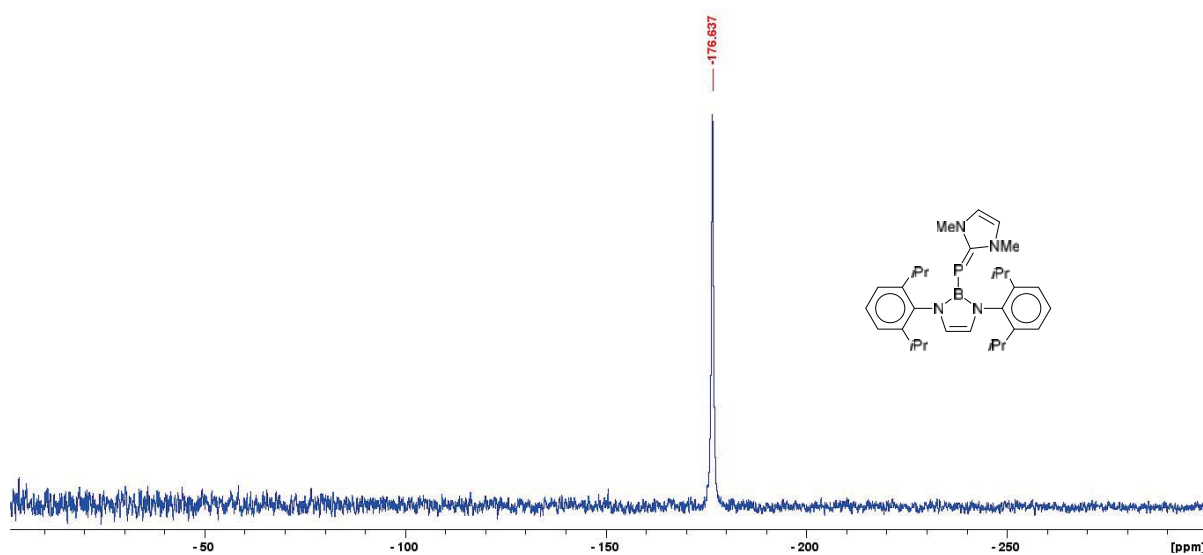

Figure S6.  $^{31}\text{P}\{^1\text{H}\}$  NMR spectrum ( $\text{C}_6\text{D}_6$ , 101.2 MHz, 296 K) of **3**.

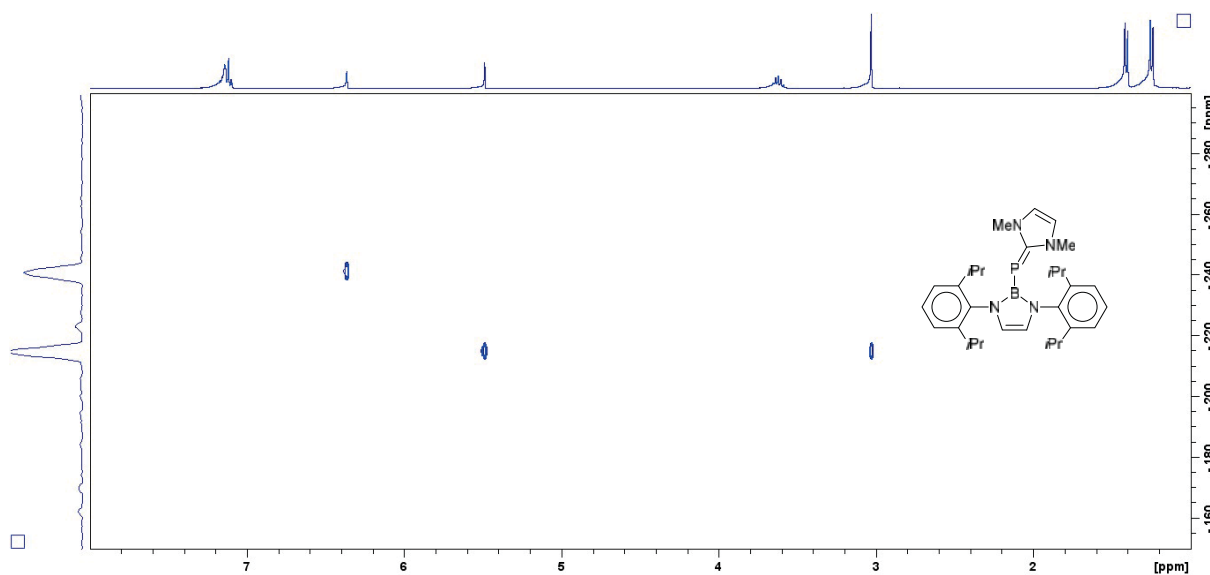

Figure S7.  $^1\text{H},^{15}\text{N}$  gsHMBC spectrum ( $\text{C}_6\text{D}_6$ , 400 MHz) of **3**.

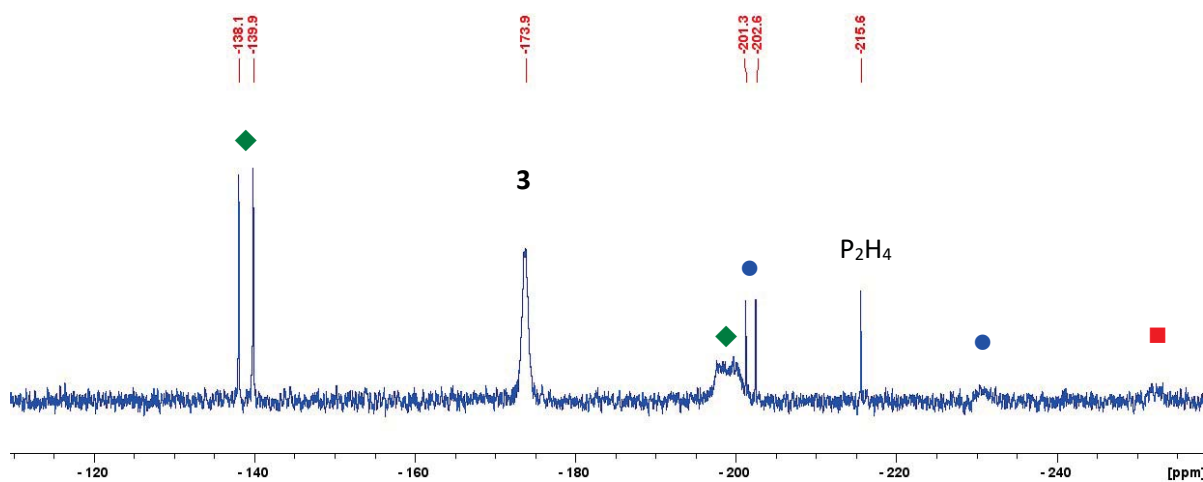

Figure S8.  $^{31}\text{P}\{^1\text{H}\}$  NMR spectrum (pentane, 162 MHz) of the product mixture resulting from reaction of **1** with **2** without additional base. Signal assignments: ■ =  $\text{DipNHB-PH}_2$ , ● =  $\text{DipNHB-PH-PH}_2$ , ◆ =  $\text{DipNHB-PH-P-Imid}^{\text{Me}}$ .

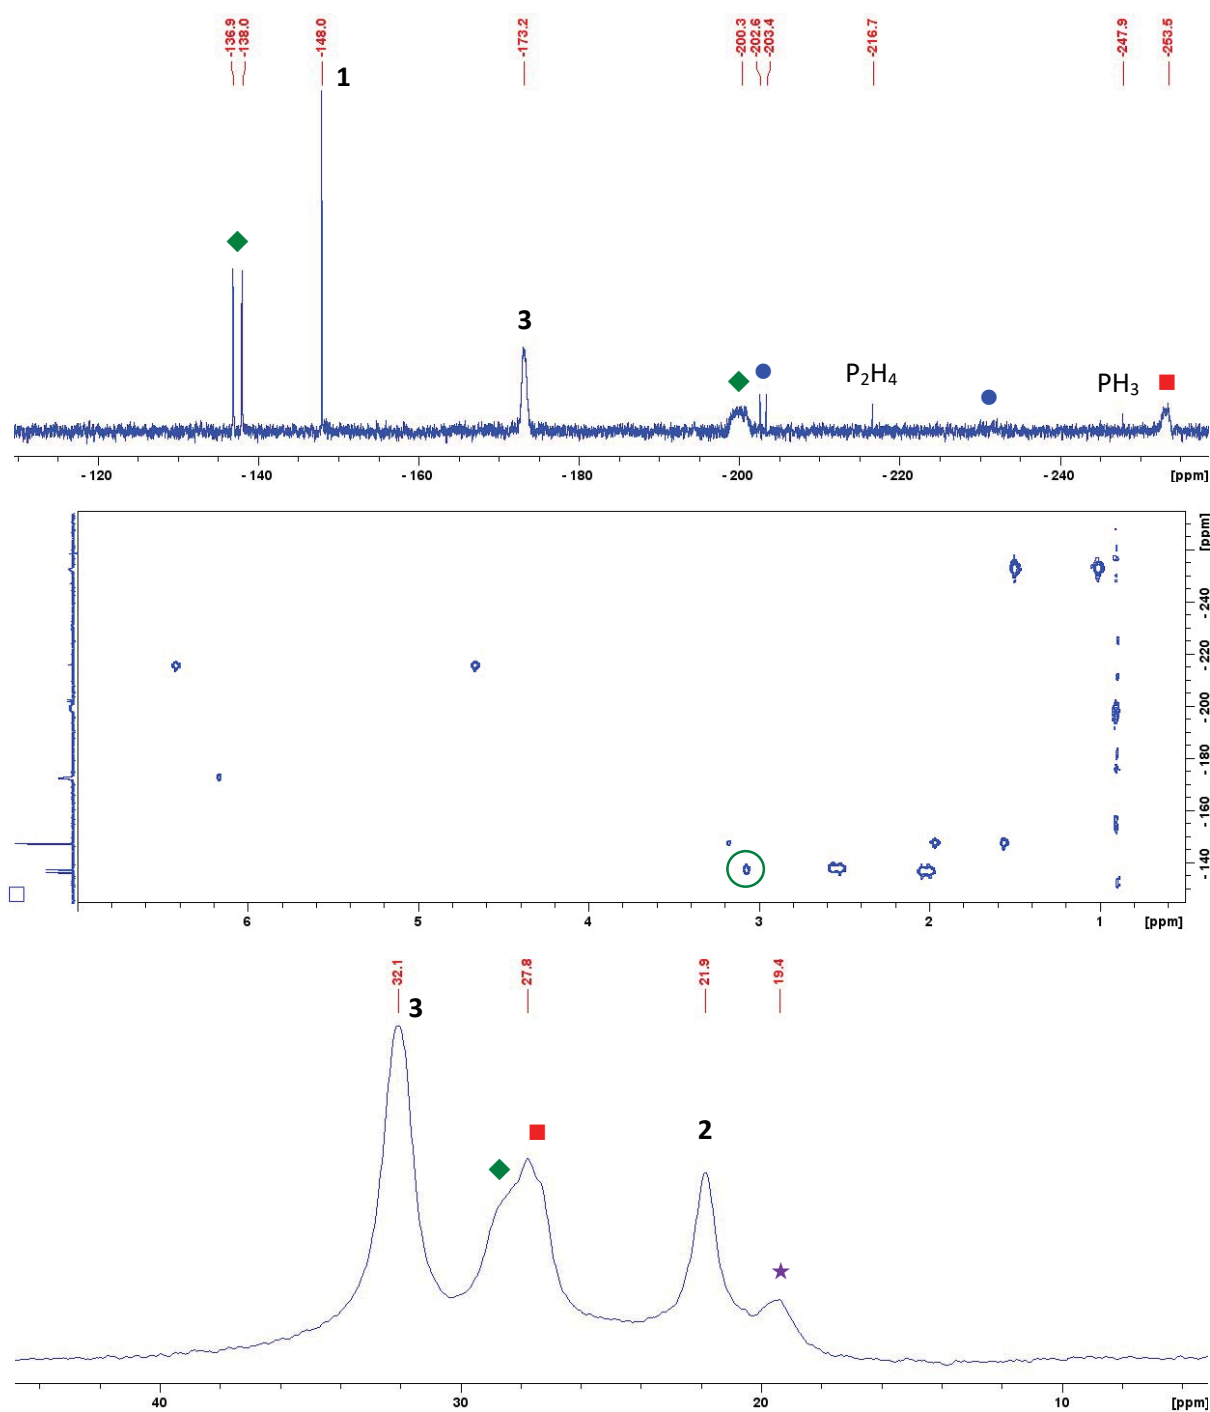

**Figure S9.**  $^{31}\text{P}\{^1\text{H}\}$  (top),  $^1\text{H}, ^{31}\text{P}$  HMQC (middle) and  $^{11}\text{B}\{^1\text{H}\}$  NMR spectra (pentane, 162 MHz) of the product mixture resulting from reaction of **1** with **2** (2 equiv.) in the presence of DABCO. Signal assignments:  $\blacksquare$  =  $\text{DipNHB-PH}_2$ ,  $\bullet$  =  $\text{DipNHB-PH-PH}_2$ ,  $\blacklozenge$  =  $\text{DipNHB-PH-P-Imid}^{\text{Me}}$ ,  $\star$  =  $\text{DipNHB-H}$ . Crucial for the assignment of  $\text{DipNHB-PH-P-Imid}^{\text{Me}}$  is a correlation of one  $^{31}\text{P}$  NMR signal with the signal of the  $\text{NCH}_3(\text{imid})$  protons (green circle). The formation of this species can be explained as resulting from base induced condensation of a transient diphosphine  $^{\text{Me}}\text{imid-PHPH}_2$  with **2** (see 5). The formation mechanism of  $\text{DipNHB-H}$  is unknown.

## Computational Studies

**General remarks.** DFT calculations were carried out with the Gaussian 16<sup>6</sup> program package using the B3LYP functional<sup>7</sup> with Weigend's and Ahlrichs' def2-SVP and def2-TZVP basis sets<sup>8</sup> on an ultrafine grid for numerical integration. Grimme's D3BJ formalism<sup>9</sup> was applied to include dispersion effects. The molecular structures were established by full energy optimization at the B3LYP-D3BJ/def2-SVP level. Harmonic vibrational frequency calculations were carried out at the same level to identify the resulting stationary points as local minima (only positive normal modes) or transition states (one imaginary normal mode). Electronic energies were recalculated at the final geometries at the B3LYP-D3BJ/def2-TZVP level. Standard Gibbs free energies  $\Delta G^0$  (for  $p=1$  bar and  $T=298.13$  K) of local minima and transition states were computed using these energies with the corrections obtained with the smaller basis sets. Relaxed potential energy scans (PES) were carried out at the B3LYP-D3BJ/def2-SVP level, using the optimized structures as starting points and one of the N-E-P-E ( $E = C, B$ ) torsional angles as independent variable. The geometries obtained after convergence at each step were then used to evaluate the interplanar angles  $\theta'(X)$  between the ring plane of a substituent X and the central EPE plane. For the graphic representation, the resulting angles (spanning a range between  $0^\circ$  and  $90^\circ$ ) were projected on an interval  $0^\circ \leq \theta \leq 180^\circ$  to represent a full torsional motion. NBO/NRT analyses of the B3LYP-D3BJ/def2-SVP densities were carried out with the NBO6.0 program.<sup>10</sup> MOLDEN<sup>11</sup> was used for visualization.

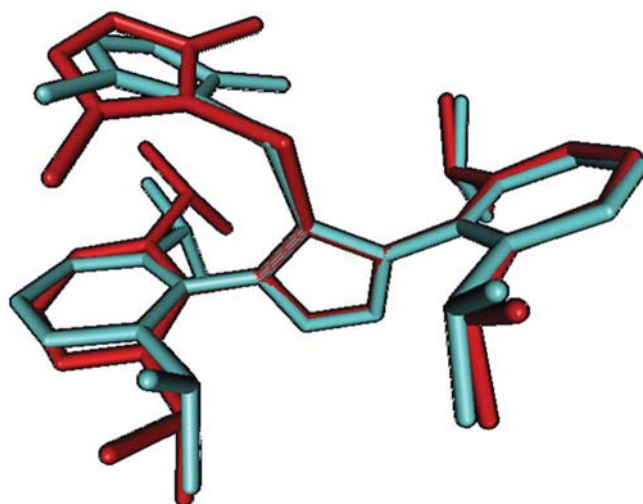

**Figure S10.** Wireframe representation of the overlay of the observed (red, major conformer) and computed (at the B3LYP-D3BJ/def2-SVP level) molecular structure of **3**. Hydrogen atoms were omitted for clarity.

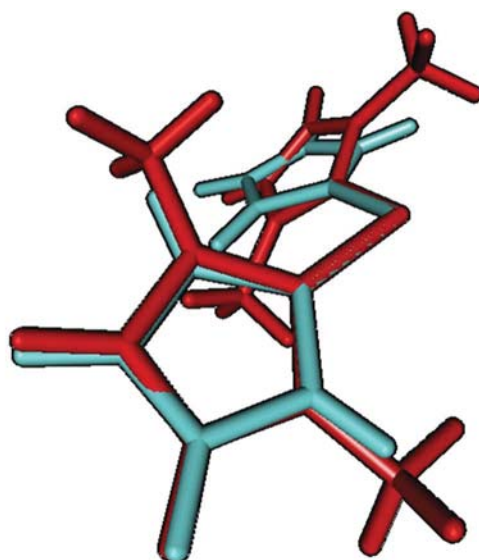

**Figure S11.** Wireframe representation of the overlay of the computed (at the B3LYP-D3BJ/def2-SVP level) molecular structures of **3<sup>Me</sup>** (red) and **3<sup>H</sup>** (blue) illustrating the shrinking skew in the helical conformation with decreasing steric demand of the N-substituents. Analogous trends for **(4<sup>R</sup>)<sup>+</sup>** and **(5<sup>R</sup>)<sup>-</sup>** can be derived from the  $\theta$ -values in Table S2.



**Table S2.** Calculated E–P distances (at the B3LYP-D3BJ/def2-SVP level of theory, E = B, C), twist angles  $\theta(X)$ , Natural Bond Orders (from NRT analyses of the B3LYP-D3BJ/def2-SVP density) and Wiberg indexes (WBI) for **3**, **3<sup>R</sup>** – (**5<sup>R</sup>**)<sup>–</sup> (R = H, Me), <sup>Me</sup>imid-PH, (<sup>Me</sup>imid-PH<sub>2</sub>)<sup>+</sup>, (<sup>Me</sup>NHB-PH)<sup>–</sup> and <sup>Me</sup>NHB-PH<sub>2</sub>.

| Compound                                                          | E | $\Theta$ <sup>a)</sup> | E–P/Å | Natural bond order (NRT) | WBI  |
|-------------------------------------------------------------------|---|------------------------|-------|--------------------------|------|
| <b>3</b>                                                          | C | 53.2                   | 1.785 |                          | 1.19 |
|                                                                   | B | 42.7                   | 1.902 |                          | 1.20 |
| <sup>Me</sup> Imid-PH                                             | C | 0.0 <sup>b)</sup>      | 1.760 |                          | 1.38 |
| <sup>H</sup> Imid-PH                                              | C | 0.0 <sup>b)</sup>      | 1.753 | 1.51                     | 1.40 |
| ( <sup>Me</sup> Imid-PH <sub>2</sub> ) <sup>+</sup> <sup>c)</sup> | C | --                     | 1.854 |                          | 0.96 |
| ( <sup>H</sup> Imid-PH <sub>2</sub> ) <sup>+</sup> <sup>c)</sup>  | C | --                     | 1.856 | 1.00                     | 0.96 |
| ( <sup>Dip</sup> NHB-PH) <sup>–</sup>                             | B | 3.1 <sup>b)</sup>      | 1.863 |                          | 1.51 |
| ( <sup>Me</sup> NHB-PH) <sup>–</sup>                              | B | 16.3 <sup>b)</sup>     | 1.870 |                          | 1.45 |
| ( <sup>H</sup> NHB-PH) <sup>–</sup>                               | B |                        | 1.872 | 1.85                     | 1.48 |
| <sup>Dip</sup> NHB-PH <sub>2</sub>                                | B | --                     | 1.927 |                          | 1.09 |
| <sup>Me</sup> NHB-PH <sub>2</sub> <sup>c)</sup>                   | B | --                     | 1.943 |                          | 1.05 |
| <sup>H</sup> NHB-PH <sub>2</sub> <sup>c)</sup>                    | B | --                     | 1.943 | 1.02                     | 1.05 |
| <b>3<sup>Me</sup></b>                                             | C | 27.8                   | 1.773 |                          | 1.30 |
|                                                                   | B | 50.3                   | 1.913 |                          | 1.12 |
| <b>3<sup>H*</sup></b> <sup>d)</sup>                               | C | 27.8                   | 1.773 | 1.49                     | 1.33 |
|                                                                   | B | 50.3                   | 1.913 | 1.04                     | 1.13 |
| <b>3<sup>H</sup></b>                                              | C | 4.2                    | 1.762 | 1.49                     | 1.34 |
|                                                                   | B | 37.6                   | 1.911 | 1.15                     | 1.14 |
| <b>(4<sup>Me</sup>)<sup>+</sup></b>                               | C | 40.4                   | 1.807 |                          | 1.10 |
| <b>(4<sup>H*</sup>)<sup>+</sup></b> <sup>d)</sup>                 | C | 40.4                   | 1.807 | 1.22                     | 1.12 |
| <b>(4<sup>H</sup>)<sup>+</sup></b>                                | C | 27.5                   | 1.798 | 1.26                     | 1.14 |
| <b>(5<sup>Me</sup>)<sup>–</sup></b>                               | B | 38.4                   | 1.888 |                          | 1.29 |
| <b>(5<sup>H*</sup>)<sup>–</sup></b> <sup>d)</sup>                 | B | 38.4                   | 1.888 | 1.35                     | 1.31 |
| <b>(5<sup>H</sup>)<sup>–</sup></b>                                | B | 16.3                   | 1.883 | 1.39                     | 1.33 |

a) interplanar angle between the central E1–P–E2 and the ring plane of the heterocyclic substituent containing E. b) angle between the plane of the N-heterocycle and the P–H bond. c) C<sub>s</sub>-conformer in which the ring plane bisects the HPH angle and the heterocyclic  $\pi$ -system is orthogonal to the P-centred lone-pair. d) molecular geometry of the corresponding N-Me derivative with H-atom positions optimized.

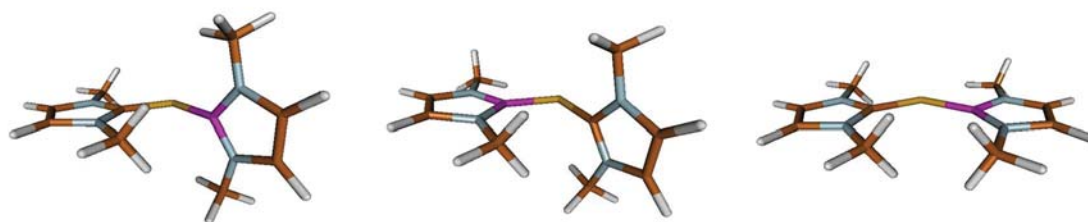

**Figure S12.** Wireframe representation of the molecular structures of rotational transition states for **3<sup>Me</sup>** (at the B3LYP-D3BJ/def2-SVP level) showing (from left to right) 'orthogonal' transition states associated with rotation around the P–B and P–C bond, respectively, and the 'planar' transition state. Relative energies and Gibbs enthalpies are listed in Table S3.

**Table S3.** Computed electronic energies  $\Delta E^\ddagger$  and standard Gibbs enthalpies  $\Delta G^{0,\ddagger}$  (for T=298.13 K and p=1 bar) of transition states for P–C/B bond rotation processes in **3<sup>R</sup>** – (**5<sup>R</sup>**)<sup>–</sup>, <sup>R</sup>imid-PH and (<sup>R</sup>NHB-PH)<sup>–</sup> calculated from B3LYP-D3BJ/def2-TZVP//B3LYP-D3BJ/def2-SVP energies and correction terms obtained from harmonic frequency analyses at the B3LYP-D3BJ/def2-SVP level of theory (R = H, Me).

| Compound                            | Rotated bond            | $\Delta E^\ddagger$ | $\Delta G^{0,\ddagger}$ | Compound                           | conformer | $\Delta E^\ddagger$ | $\Delta G^{0,\ddagger}$ |
|-------------------------------------|-------------------------|---------------------|-------------------------|------------------------------------|-----------|---------------------|-------------------------|
| <b>3<sup>Me</sup></b>               | P–B                     | 0.9                 | 1.7                     | <b>3<sup>H</sup></b>               | P–C       | 1.2                 | 1.5                     |
|                                     | P–C                     | 7.9                 | 7.8                     |                                    | P–B       | 10.1                | 9.7                     |
|                                     | planar TS               | 15.3                | 15.9                    |                                    | planar    | 4.1                 | 3.6                     |
| <b>(4<sup>Me</sup>)<sup>+</sup></b> | P–C                     | 4.0                 | 4.2                     | <b>(4<sup>H</sup>)<sup>+</sup></b> | P–C       | 2.6                 | 2.7                     |
|                                     | planar TS <sup>a)</sup> | 22.9                | 25.3                    |                                    | planar    | 5.2                 | 4.8                     |
| <b>(5<sup>Me</sup>)<sup>–</sup></b> | P–B                     | 2.3                 | 2.8                     | <b>(5<sup>H</sup>)<sup>–</sup></b> | P–B       | 3.6                 | 3.6                     |
|                                     | planar TS               | 12.3                | 13.5                    |                                    | planar    | 4.2                 | 7.8                     |
| <sup>Me</sup> imid-PH               | P–C                     | 12.2                | 12.1                    | <sup>H</sup> imid-PH               | P–C       | 11.9                | 11.9                    |
| <sup>(Me</sup> NHB-PH) <sup>–</sup> | P–B                     | 5.3                 | 6.1                     | <sup>(H</sup> NHB-PH) <sup>–</sup> | P–B       | 5.7                 | 6.0                     |

a) imidazole rings are coplanar but are twisted out of the CPC-plane (twist angle  $\Theta$  26.5°); the completely planar conformer is a higher order transition states with two imaginary modes at a relative energy of 5.4 kcal/mol.

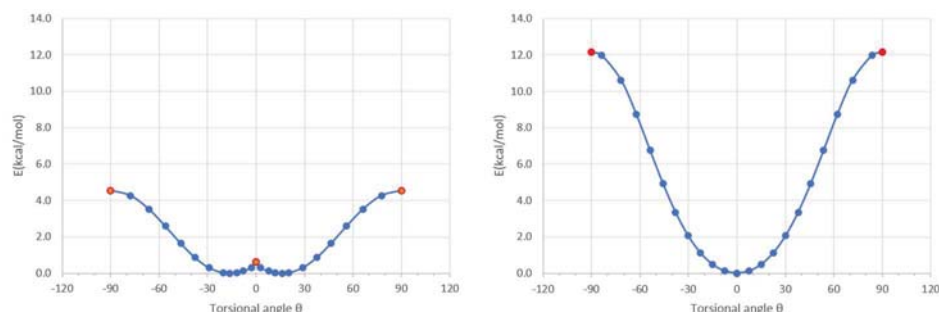

**Figure S13.** Energy profiles for rotation around the P–E bonds of (<sup>Me</sup>NHB-PH)<sup>–</sup> (E = B, left) and <sup>Me</sup>imid-PH (E = C, right).  $\Theta$  denotes the torsional angle of the PH-bond vs. the NHB/imidazole ring plane. Blue data points were derived from relaxed potential energy scans (at the B3LYP-D3BJ/def2-SVP level) and red data points refer to transition states. Note that the equilibrium geometry of (<sup>Me</sup>NHB-PH)<sup>–</sup> displays no planar but rather a slightly twisted ( $\theta = \pm 16.3^\circ$ ) conformation; that the planar geometry ( $\theta = 0^\circ$ ) corresponds to a rotational transition state.

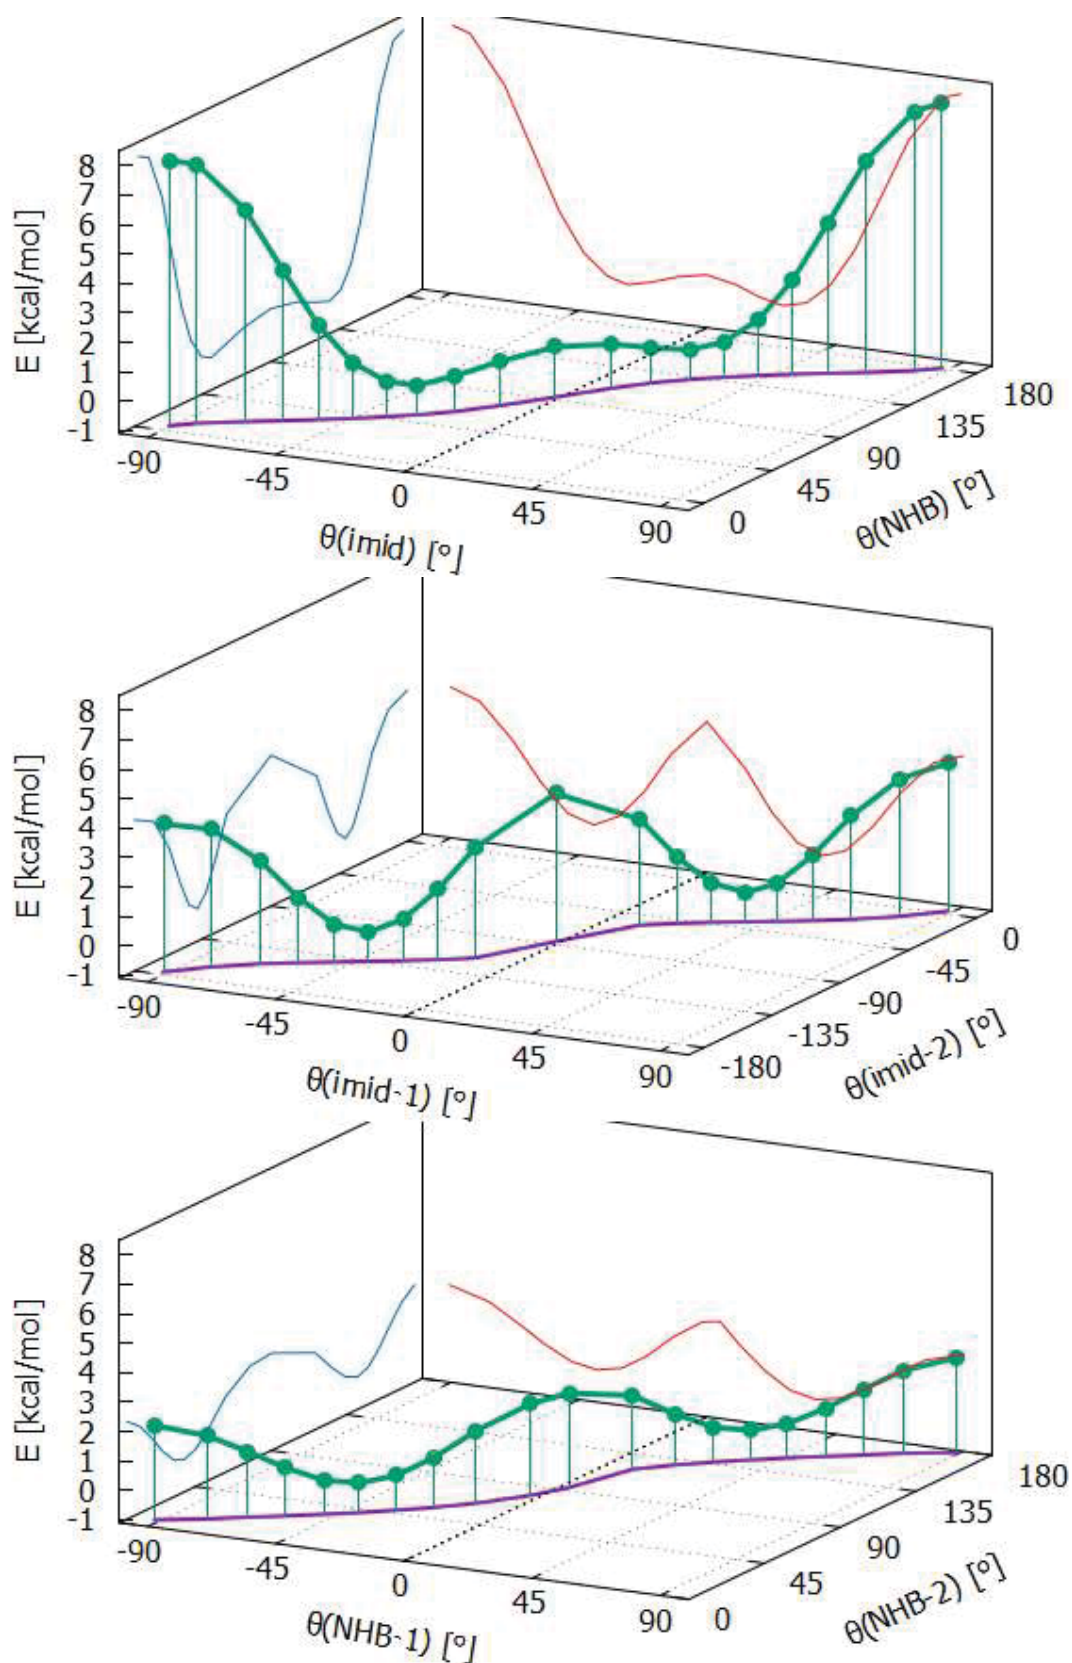

**Figure S14.** Energy profiles illustrating the concerted variation of the torsional angles  $\theta(X)$  ( $X = \text{imid}, \text{NHB}$ ;  $\theta =$  angle between the ring plane of  $X$  and the central  $\text{C/B-P-B/C}$  plane) during rotations around the  $\text{P-C/B}$  bonds in  $3^{\text{Me}}$  (top),  $(4^{\text{Me}})^+$  (middle) and  $(5^{\text{Me}})^-$  (bottom). Energies and  $\theta$ -values were derived from relaxed potential energy scans at the B3LYP-D3BJ/def2-SVP level using one of the  $\text{N-E-P-E'}$  ( $\text{E}, \text{E}' = \text{B}, \text{C}$ ) dihedral angles as independent coordinate (key: purple trace – reaction path as defined by the angles  $\theta(X1), \theta(X2)$ , green trace – energy on the reaction path, blue and red traces – projection of the energy on the two independent coordinates  $\theta(X1), \theta(X2)$ ).

**Table S4.** Results of the NRT analysis on 3H, 4H+ and (5H)-. The Lewis structure of the leading resonance structure (RS1) is shown on top. The further structures are encoded by listing incrementally any bonding (2-center NBOs) or non-bonding (1-center NBOs) electron pairs added to or removed from (in parentheses) RS 1.

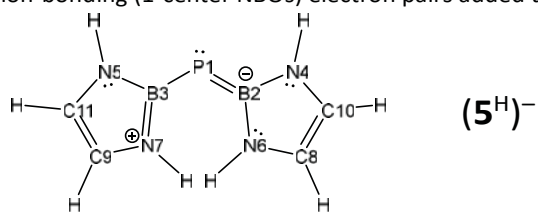

| Resonance RS | Weight(%) | Added(Removed)                                                                           |
|--------------|-----------|------------------------------------------------------------------------------------------|
| 1*(2)        | 7.70      |                                                                                          |
| 2*(2)        | 7.70      | ( P 1-B 2), P 1-B 3, B 2-N 6, (B 3-N 7), ( N 6), N 7                                     |
| 3*           | 7.60      | B 3-N 5, (B 3-N 7), ( N 5), N 7                                                          |
| 4*           | 7.60      | ( P 1-B 2), P 1-B 3, B 2-N 4, (B 3-N 7), ( N 4), N 7                                     |
| 5*           | 5.67      | ( P 1-B 2), B 2-N 6, P 1, ( N 6)                                                         |
| 6*(2)        | 5.54      | ( P 1-B 2), P 1-B 3, (B 3-N 7), N 7                                                      |
| 7*(2)        | 5.54      | (B 3-N 7), N 7                                                                           |
| 8*           | 5.31      | ( P 1-B 2), B 2-N 4, B 3-N 5, (B 3-N 7), P 1, ( N 4), ( N 5), N 7                        |
| 9            | 4.99      | ( P 1-B 2), B 2-N 4, P 1, ( N 4)                                                         |
| 10           | 4.99      | ( P 1-B 2), B 2-N 6, B 3-N 5, (B 3-N 7), P 1, ( N 5), ( N 6), N 7                        |
| 11           | 2.40      | ( P 1-B 2), P 1-B 3, B 2-N 4, (B 3-N 7), N 6-C 8, (C 8-C 10), ( N 4), ( N 6), N 7, C 10  |
| 12           | 2.40      | ( P 1-B 2), P 1-B 3, B 2-N 4, (B 3-N 7), N 7-C 9, (C 9-C 11), ( N 4), C 11               |
| 13           | 2.40      | B 3-N 5, (B 3-N 7), N 6-C 8, (C 8-C 10), ( N 5), ( N 6), N 7, C 10                       |
| 14           | 2.40      | B 3-N 5, (B 3-N 7), N 7-C 9, (C 9-C 11), ( N 5), C 11                                    |
| 15           | 2.39      | ( P 1-B 2), P 1-B 3, B 2-N 4, (B 3-N 7), N 5-C 11, (C 9-C 11), ( N 4), ( N 5), N 7, C 9  |
| 16           | 2.39      | B 3-N 5, (B 3-N 7), N 4-C 10, (C 8-C 10), ( N 4), ( N 5), N 7, C 8                       |
| 17           | 2.27      | ( P 1-B 2), P 1-B 3, (B 3-N 7), N 4-C 10, (C 8-C 10), ( N 4), N 7, C 8                   |
| 18           | 2.27      | (B 3-N 7), N 5-C 11, (C 9-C 11), ( N 5), N 7, C 9                                        |
| 19           | 1.44      | ( P 1-B 2), B 2-N 6, N 4-C 10, (C 8-C 10), P 1, ( N 4), ( N 6), C 8                      |
| 20           | 1.44      | ( P 1-B 2), B 2-N 6, N 5-C 11, (C 9-C 11), P 1, ( N 5), ( N 6), C 9                      |
| 21           | 1.27      | ( P 1-B 2), N 6-C 8, (C 8-C 10), P 1, ( N 6), C 10                                       |
| 22           | 1.27      | ( P 1-B 2), B 2-N 6, (B 3-N 7), N 7-C 9, (C 9-C 11), P 1, ( N 6), C 11                   |
| 23           | 0.98      | N 4-C 10, (C 8-C 10), ( N 4), C 8                                                        |
| 24           | 0.98      | ( P 1-B 2), P 1-B 3, B 2-N 6, (B 3-N 7), N 5-C 11, (C 9-C 11), ( N 5), ( N 6), N 7, C 9  |
| 25           | 0.94      | N 5-C 11, (C 9-C 11), ( N 5), C 9                                                        |
| 26           | 0.94      | ( P 1-B 2), P 1-B 3, B 2-N 6, (B 3-N 7), N 4-C 10, (C 8-C 10), ( N 4), ( N 6), N 7, C 8  |
| 27           | 0.89      | N 6-C 8, (C 8-C 10), ( N 6), C 10                                                        |
| 28           | 0.89      | ( P 1-B 2), P 1-B 3, B 2-N 6, (B 3-N 7), N 7-C 9, (C 9-C 11), ( N 6), C 11               |
| 29           | 0.89      | (B 3-N 7), N 7-C 9, (C 9-C 11), C 11                                                     |
| 30           | 0.89      | ( P 1-B 2), P 1-B 3, (B 3-N 7), N 6-C 8, (C 8-C 10), ( N 6), N 7, C 10                   |
| 31           | 0.65      | P 1-B 3, B 2-N 4, (B 2-N 6), (B 3-N 7), (P 1), ( N 4), N 6, N 7                          |
| 32           | 0.65      | P 1-B 3, B 3-N 5, (B 3-N 7), (B 3-N 7), (P 1), ( N 5), N 7, N 7                          |
| 33           | 0.64      | ( P 1-B 2), P 1-B 3, P 1-B 3, B 2-N 4, (B 3-N 7), (B 3-N 7), (P 1), ( N 4), N 7, N 7     |
| 34           | 0.64      | P 1-B 2, (B 2-N 6), B 3-N 5, (B 3-N 7), (P 1), ( N 5), N 6, N 7                          |
| 35           | 0.57      | ( P 1-B 2), (P 1-B 2), P 1-B 3, P 1-B 3, B 2-N 4, (B 3-N 5), (B 3-N 7), ( N 4), N 5, N 7 |
| 36           | 0.57      | P 1-B 2, (P 1-B 3), (B 2-N 4), B 3-N 5, (B 3-N 7), N 4, ( N 5), N 7                      |
| 37           | 0.50      | P 1-B 3, (B 3-N 7), (P 1), N 7                                                           |
| 38           | 0.25      | P 1-B 2, (B 2-N 6), (P 1), N 6                                                           |
| 39           | 0.25      | ( P 1-B 2), P 1-B 3, P 1-B 3, B 2-N 6, (B 3-N 7), (B 3-N 7), (P 1), ( N 6), N 7, N 7     |
| 40           | 0.22      | P 1-B 2, (P 1-B 3), (B 2-N 4), N 4                                                       |
| 41           | 0.22      | ( P 1-B 2), (P 1-B 2), P 1-B 3, P 1-B 3, B 2-N 6, (B 3-N 5), (B 3-N 7), N 5, ( N 6), N 7 |
| 42           | 0.22      | ( P 1-B 2), P 1-B 3, (B 3-N 5), N 5                                                      |
| 43           | 0.22      | (B 2-N 4), B 2-N 6, (B 3-N 7), N 4, ( N 6), N 7                                          |
| 44-65        | 0.00      |                                                                                          |
| 100.00       | * Total * |                                                                                          |

Table S4 (continued).

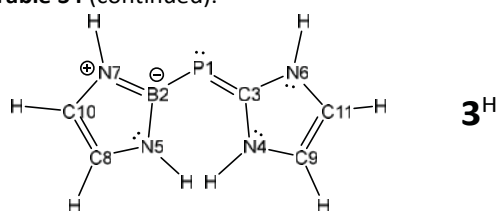

| Resonance |           |                                                                                                  |
|-----------|-----------|--------------------------------------------------------------------------------------------------|
| RS        | Weight(%) | Added(Removed)                                                                                   |
| 1*        | 14.84     |                                                                                                  |
| 2*        | 11.55     | B 2-N 5, (B 2-N 7), (N 5), N 7                                                                   |
| 3*        | 8.53      | (P 1-C 3), C 3-N 6, P 1, (N 6)                                                                   |
| 4*        | 7.88      | (P 1-C 3), B 2-N 5, (B 2-N 7), C 3-N 4, P 1, (N 4), (N 5), N 7                                   |
| 5*        | 7.73      | (P 1-C 3), C 3-N 4, P 1, (N 4)                                                                   |
| 6*        | 6.90      | (P 1-C 3), B 2-N 5, (B 2-N 7), C 3-N 6, P 1, (N 5), (N 6), N 7                                   |
| 7*        | 4.33      | (B 2-N 7), N 7                                                                                   |
| 8*        | 3.93      | P 1-B 2, (P 1-C 3), (B 2-N 7), C 3-N 6, (N 6), N 7                                               |
| 9*        | 3.15      | P 1-B 2, (P 1-C 3), (B 2-N 7), C 3-N 4, (N 4), N 7                                               |
| 10*       | 2.68      | P 1-B 2, (P 1-C 3), (B 2-N 7), N 7                                                               |
| 11        | 2.39      | (P 1-C 3), C 3-N 6, N 5-C 8, (C 8-C 10), P 1, (N 5), (N 6), C 10                                 |
| 12        | 2.35      | (P 1-C 3), C 3-N 6, N 4-C 9, (C 9-C 11), P 1, (N 4), (N 6), C 11                                 |
| 13        | 1.92      | (B 2-N 7), N 5-C 8, (C 8-C 10), (N 5), N 7, C 10                                                 |
| 14        | 1.89      | B 2-N 5, (B 2-N 7), N 7-C 10, (C 8-C 10), (N 5), C 8                                             |
| 15        | 1.87      | B 2-N 5, (B 2-N 7), N 6-C 11, (C 9-C 11), (N 5), (N 6), N 7, C 9                                 |
| 16        | 1.85      | B 2-N 5, (B 2-N 7), N 4-C 9, (C 9-C 11), (N 4), (N 5), N 7, C 11                                 |
| 17        | 1.45      | P 1-B 2, (P 1-C 3), (B 2-N 7), C 3-N 4, N 7-C 10, (C 8-C 10), (N 4), C 8                         |
| 18        | 1.44      | (B 2-N 7), N 7-C 10, (C 8-C 10), C 8                                                             |
| 19        | 1.36      | N 6-C 11, (C 9-C 11), (N 6), C 9                                                                 |
| 20        | 1.33      | N 4-C 9, (C 9-C 11), (N 4), C 11                                                                 |
| 21        | 1.32      | P 1-B 2, (P 1-C 3), (B 2-N 7), C 3-N 4, N 6-C 11, (C 9-C 11), (N 4), (N 6), N 7, C 9             |
| 22        | 1.31      | N 5-C 8, (C 8-C 10), (N 5), C 10                                                                 |
| 23        | 0.86      | (P 1-C 3), B 2-N 5, (B 2-N 7), C 3-N 4, N 7-C 10, (C 8-C 10), P 1, (N 4), (N 5), C 8             |
| 24        | 0.85      | P 1-B 2, (P 1-C 3), (B 2-N 7), C 3-N 4, N 5-C 8, (C 8-C 10), (N 4), (N 5), N 7, C 10             |
| 25        | 0.84      | (P 1-C 3), B 2-N 5, (B 2-N 7), C 3-N 4, N 6-C 11, (C 9-C 11), P 1, (N 4), (N 5), (N 6), N 7, C 9 |
| 26        | 0.82      | P 1-B 2, (P 1-C 3), (B 2-N 7), N 4-C 9, (C 9-C 11), (N 4), N 7, C 11                             |
| 27        | 0.78      | P 1-C 3, B 2-N 5, (B 2-N 7), (C 3-N 4), (P 1), N 4, (N 5), N 7                                   |
| 28        | 0.58      | (P 1-B 2), P 1-C 3, B 2-N 5, (B 2-N 7), (C 3-N 6), (N 5), N 6, N 7                               |
| 29        | 0.58      | P 1-B 2, (P 1-C 3), (B 2-N 7), N 4-C 9, (C 9-C 11), C 3, (N 4), N 7                              |
| 30        | 0.56      | P 1-C 3, (C 3-N 4), (P 1), N 4                                                                   |
| 31        | 0.42      | (P 1-B 2), P 1-C 3, (C 3-N 6), N 6                                                               |
| 32        | 0.25      | (P 1-C 3), B 2-N 5, (B 2-N 7), C 3-N 6, N 7-C 10, (C 8-C 10), P 1, (N 5), (N 6), C 8             |
| 33        | 0.24      | (P 1-C 3), B 2-N 5, (B 2-N 7), C 3-N 6, N 4-C 9, (C 9-C 11), P 1, (N 4), (N 5), (N 6), N 7, C 11 |
| 34        | 0.23      | (P 1-C 3), C 3-N 4, N 5-C 8, (C 8-C 10), P 1, (N 4), (N 5), C 10                                 |
| 35        | 0.23      | (P 1-C 3), C 3-N 4, N 6-C 11, (C 9-C 11), P 1, (N 4), (N 6), C 9                                 |
| 36        | 0.21      | P 1-B 2, (P 1-C 3), (B 2-N 7), C 3-N 6, N 7-C 10, (C 8-C 10), (N 6), C 8                         |
| 37        | 0.19      | P 1-B 2, (P 1-C 3), (B 2-N 7), C 3-N 6, N 4-C 9, (C 9-C 11), (N 4), (N 6), N 7, C 11             |
| 38        | 0.12      | P 1-B 2, (P 1-C 3), (B 2-N 7), C 3-N 6, N 5-C 8, (C 8-C 10), (N 5), (N 6), N 7, C 10             |
| 39        | 0.12      | P 1-B 2, (P 1-C 3), (B 2-N 7), N 6-C 11, (C 9-C 11), (N 6), N 7, C 9                             |
| 40-49     | 0.08      |                                                                                                  |
| 100.00    | * Total * |                                                                                                  |

Table S4 (continued).

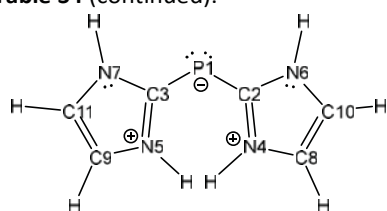

(4H)<sup>+</sup>

| Resonance |           |                                                                                                 |
|-----------|-----------|-------------------------------------------------------------------------------------------------|
| RS        | Weight(%) | Added(Removed)                                                                                  |
| 1*        | 11.32     |                                                                                                 |
| 2*        | 10.43     | P 1- C 3, ( C 2- N 4), C 2- N 6, ( C 3- N 5), ( P 1), N 4, N 5, ( N 6)                          |
| 3*        | 10.43     | P 1- C 2, ( C 2- N 4), ( C 3- N 5), C 3- N 7, ( P 1), N 4, N 5, ( N 7)                          |
| 4*        | 9.90      | ( C 3- N 5), C 3- N 7, N 5, ( N 7)                                                              |
| 5*        | 9.90      | ( C 2- N 4), C 2- N 6, N 4, ( N 6)                                                              |
| 6*        | 3.85      | ( C 2- N 4), C 2- N 6, ( C 3- N 5), C 3- N 7, N 4, N 5, ( N 6), ( N 7)                          |
| 7         | 3.53      | P 1- C 2, ( C 2- N 4), ( C 3- N 5), ( P 1), N 4, N 5                                            |
| 8         | 3.53      | P 1- C 3, ( C 2- N 4), ( C 3- N 5), ( P 1), N 4, N 5                                            |
| 9*        | 3.11      | P 1- C 3, ( C 3- N 5), ( P 1), N 5                                                              |
| 10*       | 3.11      | P 1- C 2, ( C 2- N 4), ( P 1), N 4                                                              |
| 11        | 2.60      | ( C 2- N 4), C 2- N 6, ( C 3- N 5), C 3- N 7, N 4- C 8, ( C 8- C 10), N 5, ( N 6), ( N 7), C 10 |
| 12        | 2.60      | ( C 2- N 4), C 2- N 6, ( C 3- N 5), C 3- N 7, N 5- C 9, ( C 9- C 11), N 4, ( N 6), ( N 7), C 11 |
| 13        | 2.13      | P 1- C 3, ( C 3- N 5), N 6- C 10, ( C 8- C 10), ( P 1), N 5, ( N 6), C 8                        |
| 14        | 2.13      | P 1- C 2, ( C 2- N 4), N 7- C 11, ( C 9- C 11), ( P 1), N 4, ( N 7), C 9                        |
| 15        | 1.96      | P 1- C 3, ( C 3- N 5), N 7- C 11, ( C 9- C 11), ( P 1), N 5, ( N 7), C 9                        |
| 16        | 1.96      | P 1- C 2, ( C 2- N 4), N 6- C 10, ( C 8- C 10), ( P 1), N 4, ( N 6), C 8                        |
| 17        | 1.89      | P 1- C 3, ( C 2- N 4), ( C 3- N 5), N 4- C 8, ( C 8- C 10), ( P 1), C 2, N 5                    |
| 18        | 1.89      | P 1- C 2, ( C 2- N 4), ( C 3- N 5), N 5- C 9, ( C 9- C 11), ( P 1), C 3, N 4                    |
| 19        | 1.81      | ( C 2- N 4), ( C 3- N 5), C 3- N 7, N 6- C 10, ( C 8- C 10), C 2, N 4, N 5, ( N 6), ( N 7)      |
| 20        | 1.81      | ( C 2- N 4), C 2- N 6, ( C 3- N 5), N 7- C 11, ( C 9- C 11), C 3, N 4, N 5, ( N 6), ( N 7)      |
| 21        | 1.55      | P 1- C 3, ( C 3- N 5), N 5- C 9, ( C 9- C 11), ( P 1), C 11                                     |
| 22        | 1.55      | P 1- C 2, ( C 2- N 4), N 4- C 8, ( C 8- C 10), ( P 1), C 10                                     |
| 23        | 1.33      | P 1- C 3, ( C 2- N 4), ( C 3- N 5), N 4- C 8, ( C 8- C 10), ( P 1), N 5, C 10                   |
| 24        | 1.33      | P 1- C 2, ( C 2- N 4), ( C 3- N 5), N 5- C 9, ( C 9- C 11), ( P 1), N 4, C 11                   |
| 25        | 1.29      | ( C 2- N 4), ( C 3- N 5), C 3- N 7, N 6- C 10, ( C 8- C 10), N 4, N 5, ( N 6), ( N 7), C 8      |
| 26        | 1.29      | ( C 2- N 4), C 2- N 6, ( C 3- N 5), N 7- C 11, ( C 9- C 11), N 4, N 5, ( N 6), ( N 7), C 9      |
| 27        | 0.22      | ( C 3- N 5), C 3- N 7, N 6- C 10, ( C 8- C 10), N 5, ( N 6), ( N 7), C 8                        |
| 28        | 0.22      | ( C 2- N 4), C 2- N 6, N 7- C 11, ( C 9- C 11), N 4, ( N 6), ( N 7), C 9                        |
| 29        | 0.20      | ( C 3- N 5), C 3- N 7, N 5- C 9, ( C 9- C 11), ( N 7), C 11                                     |
| 30        | 0.20      | ( C 2- N 4), C 2- N 6, N 4- C 8, ( C 8- C 10), ( N 6), C 10                                     |
| 31        | 0.18      | ( C 3- N 5), N 7- C 11, ( C 9- C 11), C 3, N 5, ( N 7)                                          |
| 32        | 0.18      | ( C 2- N 4), N 6- C 10, ( C 8- C 10), C 2, N 4, ( N 6)                                          |
| 33        | 0.14      | ( C 3- N 5), N 7- C 11, ( C 9- C 11), N 5, ( N 7), C 9                                          |
| 34        | 0.14      | ( C 2- N 4), N 6- C 10, ( C 8- C 10), N 4, ( N 6), C 8                                          |
| 35        | 0.13      | ( C 2- N 4), ( C 3- N 5), C 3- N 7, N 4- C 8, ( C 8- C 10), N 5, ( N 7), C 10                   |
| 36        | 0.13      | ( C 2- N 4), C 2- N 6, ( C 3- N 5), N 5- C 9, ( C 9- C 11), N 4, ( N 6), C 11                   |
| 37-50     | 0.00      |                                                                                                 |
|           | 100.00    | * Total *                                                                                       |

**Table S5.** Computed B3LYP-D3BJ/def2-SVP Cartesian atomic coordinates (in Å) and energies (in Hartree)

| <b>3</b> (E = -1792.15284854) |               |               |               |   |               |               |               |
|-------------------------------|---------------|---------------|---------------|---|---------------|---------------|---------------|
| B                             | 2.4783513885  | 12.7655804794 | 3.4394987701  | H | 1.290709748   | 18.1231683952 | 2.1050351029  |
| N                             | 3.145191299   | 14.0449208591 | 3.227290297   | H | 2.0864193495  | 15.6707003339 | 4.7672131553  |
| N                             | 3.4796893326  | 11.9615707989 | 4.1051301958  | H | 2.9845509172  | 12.4084819044 | 6.3690814097  |
| P                             | 0.8327284321  | 12.1576464925 | 2.7038673543  | H | 3.0566654069  | 8.7850906238  | 7.4080241186  |
| C                             | 4.4592503439  | 13.9470973963 | 3.7061168692  | H | 3.4262256692  | 7.4222250231  | 3.352928569   |
| C                             | 2.7365000429  | 15.0403720268 | 2.2910257156  | H | 3.078698148   | 10.8074741795 | 1.9138024473  |
| C                             | 4.6539283096  | 12.7127930946 | 4.2361109378  | H | -0.0120251076 | 13.7071372917 | 0.464637024   |
| C                             | 3.3845737151  | 10.6122175298 | 4.5488656516  | H | -1.2895545993 | 14.9560535207 | 0.2619060148  |
| C                             | -0.1631453482 | 13.5931484602 | 3.0717582264  | H | -1.7326320998 | 13.2278276233 | 0.4930106742  |
| C                             | 2.8584931469  | 14.7538189113 | 0.9111810444  | H | -2.5112590234 | 15.7920821311 | 2.3670079036  |
| C                             | 2.1951068266  | 16.2658595092 | 2.7386036356  | H | 0.1997992555  | 12.584682658  | 5.488228065   |
| C                             | 3.2239519226  | 10.2473494448 | 5.9244070321  | H | -0.4863061086 | 14.0044388678 | 6.3765979266  |
| C                             | 3.4470383543  | 9.5664270846  | 3.5984184818  | H | 1.1694726179  | 14.0596421234 | 5.6875983704  |
| N                             | -1.0041546443 | 14.2423411828 | 2.2015663589  | H | -1.7697500517 | 15.6916509948 | 5.0382672585  |
| N                             | -0.421801984  | 14.1642381278 | 4.2982340859  | H | 5.5330923599  | 12.9625692521 | -0.3829219228 |
| C                             | 3.5758478181  | 13.5045340077 | 0.4182255904  | H | 4.9295777972  | 14.5364616266 | -0.9657126547 |
| C                             | 2.3726402896  | 15.6921288737 | -0.008644909  | H | 5.5614166347  | 14.3832743509 | 0.6922873052  |
| C                             | 1.7208287366  | 17.1740628638 | 1.7817720799  | H | 3.3339260802  | 11.8115848858 | -0.9216900502 |
| C                             | 2.1876739799  | 16.6185450434 | 4.2185819658  | H | 1.8118831664  | 12.4070900916 | -0.2194268033 |
| C                             | 3.1035922965  | 11.475711585  | 6.9378965186  | H | 2.6122776757  | 13.3066363707 | -1.5502126023 |
| C                             | 3.1721636856  | 9.0112449804  | 6.3454754302  | H | 1.4157064527  | 17.6046240812 | -0.3120283318 |
| C                             | 3.3792831089  | 8.2478667096  | 4.0642307473  | H | 3.5287241376  | 17.4879804113 | 5.7116641706  |
| C                             | 3.6181601727  | 9.8726021398  | 2.1159386865  | H | 4.3747169357  | 16.5787329587 | 4.4396975164  |
| C                             | -1.0193719591 | 14.0201248072 | 0.7698028644  | H | 3.701883032   | 18.1852099681 | 4.0789567091  |
| C                             | -1.7808623232 | 15.169966372  | 2.8752061923  | H | 0.9725024172  | 17.6025385488 | 5.7295175853  |
| C                             | 0.1470561437  | 13.6831637399 | 5.5389586858  | H | 1.1922524281  | 18.5709206831 | 4.2644215235  |
| C                             | -1.4138564407 | 15.1239059169 | 4.1842277465  | H | 0.0712936198  | 17.1913571203 | 4.2449253411  |
| C                             | 4.9804777326  | 13.8696679545 | -0.0890656917 | H | 1.7312217578  | 12.2097019661 | 8.4665919236  |
| C                             | 2.7820826598  | 12.7204463687 | -0.6321678864 | H | 0.9530788391  | 11.1860435607 | 7.2271373252  |
| C                             | 1.7943648577  | 16.8860253626 | 0.4194382174  | H | 1.9485772098  | 10.4484962172 | 8.5000526514  |
| C                             | 3.5285479978  | 17.2496272196 | 4.6353356287  | H | 5.2608727039  | 11.7857710268 | 7.149532866   |
| C                             | 1.0369726906  | 17.5434010538 | 4.6311167273  | H | 4.2954607325  | 12.4511128679 | 8.4910459921  |
| C                             | 1.8638382576  | 11.3192392475 | 7.8303231834  | H | 4.5644014708  | 10.693582773  | 8.3681213811  |
| C                             | 4.3791571224  | 11.6097397031 | 7.7836356442  | H | 3.208338893   | 6.9320672902  | 5.7681751962  |
| C                             | 3.2535347963  | 7.9689639164  | 5.4257915888  | H | 3.0383266888  | 9.1660182211  | 0.1511388831  |
| C                             | 3.0065874081  | 8.8143395604  | 1.194285156   | H | 3.5549100511  | 7.8588097715  | 1.2322958685  |
| C                             | 5.0962578703  | 10.1197775145 | 1.7715829401  | H | 1.9549369528  | 8.6204204118  | 1.4542356046  |
| H                             | 5.1671435219  | 14.7663507796 | 3.6136975536  | H | 5.2060520282  | 10.3855728547 | 0.7074274291  |
| H                             | 5.542897627   | 12.3015339886 | 4.7082735998  | H | 5.5149488356  | 10.942948854  | 2.3679647165  |
| H                             | 3.7077508576  | 12.838176254  | 1.2785924886  | H | 5.6989322457  | 9.2163879999  | 1.9622183922  |
| H                             | 2.4551746859  | 15.4864028041 | -1.0782594604 |   |               |               |               |

**Table S4.** Continued

| <b>3<sup>Me</sup> (E = -937.390033493)</b> |               |               |              | <b>4<sup>Me</sup> (E = -950.377864832)</b> |               |               |               |
|--------------------------------------------|---------------|---------------|--------------|--------------------------------------------|---------------|---------------|---------------|
| C                                          | -1.5190279319 | 14.853577013  | 3.9279288475 | C                                          | -1.4975453951 | 14.8916882721 | 3.9291939264  |
| N                                          | -0.3756081227 | 14.0628678207 | 3.937486635  | N                                          | -0.4179246403 | 14.0277189395 | 4.03575407    |
| C                                          | -0.1377861143 | 13.549468957  | 2.6746804207 | C                                          | -0.0923982293 | 13.536141893  | 2.8018318044  |
| N                                          | -1.1740355251 | 14.0424126263 | 1.9031891311 | N                                          | -0.9872975484 | 14.093000661  | 1.9346500158  |
| C                                          | -2.0189687999 | 14.8328526101 | 2.6662032666 | C                                          | -1.8610453754 | 14.9197359327 | 2.6181952588  |
| P                                          | 1.0799330319  | 12.4208678979 | 2.0525638213 | P                                          | 1.0982888899  | 12.2641341934 | 2.3229053385  |
| B                                          | 2.5360806778  | 12.8187094361 | 3.2281861919 | C                                          | 2.4885581367  | 12.7943422718 | 3.3481271312  |
| N                                          | 3.3552014121  | 11.877124277  | 3.9539039439 | N                                          | 3.3490056667  | 11.9260823432 | 3.9553199915  |
| C                                          | 3.2293315731  | 10.4409546675 | 4.0272778414 | C                                          | 3.2046697664  | 10.4759704766 | 3.961677915   |
| C                                          | -1.3217370849 | 13.7605571264 | 0.4935825391 | C                                          | -1.0323801093 | 13.8337406429 | 0.5013269946  |
| C                                          | 0.3233139313  | 13.6620513961 | 5.141570925  | C                                          | 0.1848531161  | 13.6120580495 | 5.292053472   |
| N                                          | 3.1253643523  | 14.1058303558 | 3.52924011   | N                                          | 3.0065717613  | 14.0412199855 | 3.5653793993  |
| C                                          | 2.724795999   | 15.4097773012 | 3.0616293703 | C                                          | 2.4945015104  | 15.2757990143 | 2.992645229   |
| C                                          | 4.2015510026  | 13.9110045168 | 4.3945794063 | C                                          | 4.1710715237  | 13.9443060681 | 4.3123073398  |
| C                                          | 4.3430211794  | 12.579295635  | 4.64031457   | C                                          | 4.3912453983  | 12.6213300976 | 4.5422839319  |
| H                                          | 4.8042340981  | 14.7389279338 | 4.7648656618 | H                                          | 4.7427757256  | 14.8192873832 | 4.6081952296  |
| H                                          | 5.0894099382  | 12.0775311722 | 5.2541733327 | H                                          | 5.1953335606  | 12.1192157499 | 5.0726917811  |
| H                                          | -0.3300763111 | 13.8076360149 | 0.0161482172 | H                                          | -0.007278793  | 13.6829583291 | 0.1348737122  |
| H                                          | -1.9990946081 | 14.4997717938 | 0.044362152  | H                                          | -1.4883047306 | 14.6942725888 | -0.0042811053 |
| H                                          | -1.7224788234 | 12.7473430023 | 0.3264064451 | H                                          | -1.6209589399 | 12.9295712606 | 0.2856375466  |
| H                                          | -2.892550284  | 15.3198354885 | 2.243089913  | H                                          | -2.6612245273 | 15.4566643017 | 2.1167660587  |
| H                                          | 0.5377754073  | 12.5844680169 | 5.087392303  | H                                          | 0.3873252266  | 12.5329525032 | 5.2482558955  |
| H                                          | -0.3205176191 | 13.8680522337 | 6.0075553992 | H                                          | -0.5179285232 | 13.8199566853 | 6.1081905497  |
| H                                          | 1.280445618   | 14.1882443426 | 5.2616629915 | H                                          | 1.1277102327  | 14.1438503465 | 5.4854613344  |
| H                                          | -1.8752031419 | 15.3594623852 | 4.8203894122 | H                                          | -1.9156999819 | 15.4036664838 | 4.7911744584  |
| H                                          | 3.6036729352  | 16.037080658  | 2.8386080946 | H                                          | 3.3024975309  | 16.0172744775 | 2.9688889407  |
| H                                          | 2.1341803894  | 15.2934922543 | 2.1416537573 | H                                          | 2.15020133    | 15.0755235089 | 1.9685813981  |
| H                                          | 2.1003567573  | 15.9508855601 | 3.7981641688 | H                                          | 1.6551439751  | 15.677552661  | 3.5785364268  |
| H                                          | 3.1836714117  | 10.0942366443 | 5.0749860687 | H                                          | 3.7123358881  | 10.0692758642 | 4.845352876   |
| H                                          | 2.3005724926  | 10.1398441846 | 3.5220107549 | H                                          | 2.135148559   | 10.2251983745 | 3.9945982335  |
| H                                          | 4.0742141593  | 9.9255746778  | 3.536565245  | H                                          | 3.6427909956  | 10.0352486403 | 3.0537798456  |

  

| <b>5<sup>Me</sup> (E = -924.253821079)</b> |               |               |               | <b>3<sup>Me</sup> TS1 (θ(NHB) = 90°, E = -937.377203135)</b> |           |           |           |
|--------------------------------------------|---------------|---------------|---------------|--------------------------------------------------------------|-----------|-----------|-----------|
| C                                          | -1.4911139016 | 14.9612171985 | 3.8983927017  | C                                                            | -2.660794 | -0.232436 | 1.807482  |
| N                                          | -0.4498019237 | 14.0458121826 | 4.0244865732  | N                                                            | -1.390039 | -0.159998 | 1.244463  |
| B                                          | -0.1769749672 | 13.4261873279 | 2.7201479474  | C                                                            | -1.480923 | 0.016089  | -0.125916 |
| N                                          | -1.1817573809 | 14.0682384878 | 1.862329241   | N                                                            | -2.843680 | 0.048077  | -0.373671 |
| C                                          | -1.9342151879 | 14.9694848932 | 2.6098893236  | C                                                            | -3.561579 | -0.103152 | 0.802504  |
| P                                          | 1.0584028412  | 12.0921957235 | 2.210335335   | P                                                            | -0.316136 | 0.186077  | -1.446634 |
| B                                          | 2.5320078304  | 12.6593819653 | 3.245956826   | B                                                            | 1.381221  | 0.070696  | -0.552014 |
| N                                          | 3.5100302115  | 11.8010174453 | 3.9274716931  | N                                                            | 2.188781  | -1.105303 | -0.331996 |
| C                                          | 3.4869347534  | 10.3692317785 | 4.0120902489  | C                                                            | 1.879899  | -2.480446 | -0.645892 |
| C                                          | -1.3621503561 | 13.871585338  | 0.4528861143  | C                                                            | -3.401546 | 0.218687  | -1.694122 |
| C                                          | 0.1809886922  | 13.753771184  | 5.2820463465  | C                                                            | -0.165775 | -0.258356 | 2.010185  |
| N                                          | 3.0506660664  | 14.0029974837 | 3.5382022681  | N                                                            | 2.189573  | 1.153167  | -0.043608 |
| C                                          | 2.5405643539  | 15.2607394539 | 3.0664146616  | C                                                            | 1.881570  | 2.563265  | -0.001916 |
| C                                          | 4.1942461948  | 13.901471966  | 4.3256983683  | C                                                            | 3.372540  | 0.626819  | 0.467292  |
| C                                          | 4.4740074649  | 12.5872480311 | 4.5518884331  | C                                                            | 3.372031  | -0.725023 | 0.294736  |
| H                                          | 4.7432228618  | 14.7795003991 | 4.6683829076  | H                                                            | 4.144598  | 1.255222  | 0.908707  |
| H                                          | 5.2981515461  | 12.1573326381 | 5.1224438763  | H                                                            | 4.143575  | -1.444729 | 0.564091  |
| H                                          | -0.5008963157 | 13.2936643007 | 0.0803489547  | H                                                            | -3.061173 | 1.170580  | -2.133549 |
| H                                          | -1.4066210971 | 14.8340994762 | -0.0955061334 | H                                                            | -4.497444 | 0.210056  | -1.625615 |
| H                                          | -2.287222043  | 13.3095624206 | 0.208433274   | H                                                            | -3.061548 | -0.590411 | -2.361048 |
| H                                          | -2.7375976967 | 15.5633839679 | 2.1723554439  | H                                                            | -4.647341 | -0.105291 | 0.819303  |
| H                                          | 0.6374499054  | 12.7541981254 | 5.2199813966  | H                                                            | 0.442206  | -1.111661 | 1.679416  |
| H                                          | -0.5545660084 | 13.7627725724 | 6.1088390306  | H                                                            | -0.428723 | -0.390764 | 3.067879  |
| H                                          | 0.9905632089  | 14.4647176802 | 5.5385974623  | H                                                            | 0.445079  | 0.648234  | 1.900405  |
| H                                          | -1.8570874832 | 15.5446732504 | 4.744197043   | H                                                            | -2.806677 | -0.369769 | 2.874671  |
| H                                          | 3.3640435162  | 15.9546911296 | 2.8114287678  | H                                                            | 2.656366  | 3.162423  | -0.510885 |
| H                                          | 1.9358994682  | 15.0766038997 | 2.1653990444  | H                                                            | 0.920748  | 2.725896  | -0.510356 |
| H                                          | 1.8834453596  | 15.7669223347 | 3.8002643574  | H                                                            | 1.794902  | 2.933652  | 1.036209  |
| H                                          | 3.6084095408  | 10.0157489123 | 5.0558579049  | H                                                            | 1.791642  | -3.099502 | 0.265921  |
| H                                          | 2.5101047865  | 10.0250982948 | 3.6353531304  | H                                                            | 0.919673  | -2.509510 | -1.179977 |
| H                                          | 4.2809077596  | 9.8861881388  | 3.4057424579  | H                                                            | 2.655073  | -2.933330 | -1.288034 |



**Table S4.** Continued

| <b>3<sup>Me</sup> TS2 (<math>\theta(\text{Imid}) = 90^\circ</math>, <math>E = -938.143193</math>)</b> |           |           |          | <b>4<sup>Me</sup> TS (<math>E = -951.147963</math>)</b> |           |           |           |
|-------------------------------------------------------------------------------------------------------|-----------|-----------|----------|---------------------------------------------------------|-----------|-----------|-----------|
| C                                                                                                     | -2.047816 | 13.275131 | 4.073787 | C                                                       | -1.784144 | 14.184346 | 4.006572  |
| N                                                                                                     | -0.945442 | 14.085477 | 4.269844 | N                                                       | -0.417384 | 13.914829 | 3.953633  |
| C                                                                                                     | -0.190123 | 14.164787 | 3.129268 | C                                                       | -0.045385 | 13.659133 | 2.660530  |
| N                                                                                                     | -0.867027 | 13.400368 | 2.215681 | N                                                       | -1.192198 | 13.773578 | 1.921526  |
| C                                                                                                     | -1.997853 | 12.843592 | 2.782251 | C                                                       | -2.262535 | 14.095650 | 2.741347  |
| P                                                                                                     | 1.271466  | 15.188911 | 2.840355 | P                                                       | 1.489391  | 13.244628 | 1.817141  |
| B                                                                                                     | 2.611440  | 13.913242 | 3.288683 | C                                                       | 2.672456  | 13.218540 | 3.216647  |
| N                                                                                                     | 2.589830  | 12.512243 | 3.682962 | N                                                       | 3.087096  | 12.123346 | 3.911567  |
| C                                                                                                     | 1.477122  | 11.618659 | 3.876079 | C                                                       | 2.509949  | 10.785747 | 3.809987  |
| C                                                                                                     | -0.416126 | 13.171599 | 0.854496 | C                                                       | -1.255561 | 13.580659 | 0.482300  |
| C                                                                                                     | -0.590514 | 14.721914 | 5.526054 | C                                                       | 0.440353  | 13.916721 | 5.123627  |
| N                                                                                                     | 4.021356  | 14.248775 | 3.269156 | N                                                       | 3.489444  | 14.234074 | 3.611003  |
| C                                                                                                     | 4.638276  | 15.499571 | 2.906791 | C                                                       | 3.429825  | 15.609008 | 3.122592  |
| C                                                                                                     | 4.760067  | 13.114912 | 3.605318 | C                                                       | 4.384062  | 13.785327 | 4.558576  |
| C                                                                                                     | 3.912561  | 12.084624 | 3.854966 | C                                                       | 4.130793  | 12.456624 | 4.747770  |
| H                                                                                                     | 5.847777  | 13.128093 | 3.655467 | H                                                       | 5.128845  | 14.435411 | 5.009756  |
| H                                                                                                     | 4.148592  | 11.066077 | 4.159373 | H                                                       | 4.612961  | 11.729094 | 5.395141  |
| H                                                                                                     | -1.254333 | 13.304487 | 0.155533 | H                                                       | -0.598814 | 14.301830 | -0.028443 |
| H                                                                                                     | -0.004322 | 12.155592 | 0.750346 | H                                                       | -2.288904 | 13.730446 | 0.147936  |
| H                                                                                                     | 0.380223  | 13.905521 | 0.656571 | H                                                       | -0.931314 | 12.561822 | 0.219446  |
| H                                                                                                     | -2.671002 | 12.199232 | 2.224346 | H                                                       | -3.266545 | 14.232398 | 2.350588  |
| H                                                                                                     | -0.252302 | 13.969700 | 6.255594 | H                                                       | 0.898342  | 12.931046 | 5.281629  |
| H                                                                                                     | -1.456751 | 15.265622 | 5.929871 | H                                                       | -0.170373 | 14.158606 | 6.001677  |
| H                                                                                                     | 0.236333  | 15.414962 | 5.307491 | H                                                       | 1.232196  | 14.672516 | 5.034145  |
| H                                                                                                     | -2.773005 | 13.079523 | 4.858298 | H                                                       | -2.286960 | 14.414035 | 4.941190  |
| H                                                                                                     | 5.011460  | 15.501177 | 1.865231 | H                                                       | 4.435636  | 15.935891 | 2.827067  |
| H                                                                                                     | 3.905024  | 16.314266 | 3.001389 | H                                                       | 2.758114  | 15.633132 | 2.255177  |
| H                                                                                                     | 5.488640  | 15.730956 | 3.571289 | H                                                       | 3.044612  | 16.273782 | 3.909841  |
| H                                                                                                     | 0.753849  | 12.007849 | 4.612020 | H                                                       | 1.949131  | 10.545137 | 4.725240  |
| H                                                                                                     | 0.920549  | 11.426744 | 2.941470 | H                                                       | 1.833446  | 10.771648 | 2.946083  |
| H                                                                                                     | 1.832093  | 10.646128 | 4.250374 | H                                                       | 3.313509  | 10.050734 | 3.669062  |

  

| <b>5<sup>Me</sup> TS (<math>E = -925.009747</math>)</b> |           |           |           | <b>3<sup>H</sup> (<math>E = -780.245147</math>)</b> |           |           |           |
|---------------------------------------------------------|-----------|-----------|-----------|-----------------------------------------------------|-----------|-----------|-----------|
| C                                                       | -1.758802 | 14.230229 | 4.004725  | P                                                   | -0.120099 | 1.669806  | 0.191117  |
| N                                                       | -0.396803 | 13.941397 | 3.925153  | B                                                   | 1.373446  | 0.481486  | 0.098036  |
| B                                                       | -0.047990 | 13.606410 | 2.530991  | C                                                   | -1.390507 | 0.455022  | 0.074922  |
| N                                                       | -1.360951 | 13.685938 | 1.865098  | N                                                   | -1.338049 | -0.905389 | -0.131367 |
| C                                                       | -2.333088 | 14.077118 | 2.780722  | N                                                   | 1.567970  | -0.841889 | 0.670305  |
| P                                                       | 1.547965  | 13.215806 | 1.616164  | N                                                   | -2.743120 | 0.711740  | 0.134130  |
| B                                                       | 2.784040  | 13.168454 | 3.060407  | N                                                   | 2.629400  | 0.726303  | -0.561402 |
| N                                                       | 3.206838  | 12.030197 | 3.877117  | C                                                   | 2.864493  | -1.289613 | 0.386531  |
| C                                                       | 2.700240  | 10.687087 | 3.804226  | C                                                   | -2.608262 | -1.458733 | -0.222937 |
| C                                                       | -1.633012 | 13.490029 | 0.472211  | C                                                   | 3.493292  | -0.349817 | -0.366054 |
| C                                                       | 0.476966  | 14.113039 | 5.053277  | C                                                   | -3.492884 | -0.442712 | -0.053572 |
| N                                                       | 3.606141  | 14.251203 | 3.598828  | H                                                   | -0.449025 | -1.375551 | -0.272408 |
| C                                                       | 3.570861  | 15.632080 | 3.202409  | H                                                   | 1.023183  | -1.272806 | 1.405223  |
| C                                                       | 4.388346  | 13.776486 | 4.645094  | H                                                   | 2.888727  | 1.519954  | -1.129973 |
| C                                                       | 4.151096  | 12.443320 | 4.811583  | H                                                   | -3.107120 | 1.645120  | 0.272657  |
| H                                                       | 5.074786  | 14.417207 | 5.199783  | H                                                   | 3.241471  | -2.251478 | 0.728173  |
| H                                                       | 4.603321  | 11.757912 | 5.529245  | H                                                   | -2.773508 | -2.518591 | -0.391120 |
| H                                                       | -0.797083 | 12.929546 | 0.025574  | H                                                   | 4.495183  | -0.381419 | -0.789546 |
| H                                                       | -1.732803 | 14.442643 | -0.090739 | H                                                   | -4.578377 | -0.443410 | -0.042433 |
| H                                                       | -2.566406 | 12.913851 | 0.313703  |                                                     |           |           |           |
| H                                                       | -3.382459 | 14.188635 | 2.504138  |                                                     |           |           |           |
| H                                                       | 1.278147  | 13.360916 | 5.042860  |                                                     |           |           |           |
| H                                                       | -0.084310 | 14.003606 | 5.999329  |                                                     |           |           |           |
| H                                                       | 0.971563  | 15.105708 | 5.070694  |                                                     |           |           |           |
| H                                                       | -2.235340 | 14.498681 | 4.948716  |                                                     |           |           |           |
| H                                                       | 4.575036  | 16.012988 | 2.929730  |                                                     |           |           |           |
| H                                                       | 2.904090  | 15.703589 | 2.327781  |                                                     |           |           |           |
| H                                                       | 3.168796  | 16.287382 | 4.001134  |                                                     |           |           |           |
| H                                                       | 2.160050  | 10.391802 | 4.725826  |                                                     |           |           |           |
| H                                                       | 1.994417  | 10.650835 | 2.958479  |                                                     |           |           |           |
| H                                                       | 3.506390  | 9.945644  | 3.636095  |                                                     |           |           |           |

**Table S4.** Continued

| $4^H$ (E = -793.213973) |           |           |           | $5^H$ (E = -767.108306) |           |           |           |
|-------------------------|-----------|-----------|-----------|-------------------------|-----------|-----------|-----------|
| P                       | 0.000000  | 1.568406  | -0.000000 | P                       | 0.000000  | 1.699554  | 0.000000  |
| C                       | 1.353975  | 0.385802  | 0.006588  | B                       | 1.425242  | 0.469491  | -0.041199 |
| C                       | -1.353975 | 0.385802  | -0.006588 | B                       | -1.425242 | 0.469491  | 0.041199  |
| N                       | 1.471875  | -0.865984 | 0.531390  | N                       | 2.831572  | 0.738300  | -0.368278 |
| N                       | -1.471875 | -0.865984 | -0.531390 | N                       | -2.831572 | 0.738300  | 0.368278  |
| N                       | 2.598787  | 0.676709  | -0.453236 | N                       | 1.499220  | -0.963689 | 0.289568  |
| N                       | -2.598787 | 0.676709  | 0.453236  | N                       | -1.499220 | -0.963689 | -0.289568 |
| C                       | 2.774540  | -1.336319 | 0.417686  | C                       | 2.811333  | -1.425595 | 0.208606  |
| C                       | -2.774540 | -1.336319 | -0.417686 | C                       | -2.811333 | -1.425595 | -0.208606 |
| C                       | 3.486335  | -0.358147 | -0.202070 | C                       | 3.612107  | -0.402512 | -0.200415 |
| C                       | -3.486335 | -0.358147 | 0.202070  | C                       | -3.612107 | -0.402512 | 0.200415  |
| H                       | 0.738585  | -1.312855 | 1.070505  | H                       | 0.767519  | -1.493780 | 0.741092  |
| H                       | -0.738585 | -1.312855 | -1.070505 | H                       | -0.767519 | -1.493780 | -0.741092 |
| H                       | 2.822622  | 1.540729  | -0.937968 | H                       | 3.225384  | 1.616208  | -0.671695 |
| H                       | -2.822622 | 1.540729  | 0.937968  | H                       | -3.225384 | 1.616208  | 0.671695  |
| H                       | 3.074283  | -2.315890 | 0.779007  | H                       | -4.683381 | -0.424342 | 0.403581  |
| H                       | -3.074283 | -2.315890 | -0.779007 | H                       | 4.683381  | -0.424342 | -0.403581 |
| H                       | 4.531931  | -0.315154 | -0.492685 | H                       | 3.092737  | -2.457690 | 0.421542  |
| H                       | -4.531931 | -0.315154 | 0.492685  | H                       | -3.092737 | -2.457690 | -0.421542 |

  

| MeImid-PH (E = -646.948118) |           |           |          | MeImid-PH TS (E = -646.928716) |           |           |          |
|-----------------------------|-----------|-----------|----------|--------------------------------|-----------|-----------|----------|
| C                           | -1.743445 | 15.083698 | 3.834269 | C                              | -1.783176 | 15.064481 | 3.851449 |
| N                           | -0.811424 | 14.130842 | 4.238836 | N                              | -0.804041 | 14.197889 | 4.293623 |
| C                           | -0.165537 | 13.600077 | 3.139543 | C                              | -0.092190 | 13.684738 | 3.241233 |
| N                           | -0.724670 | 14.250691 | 2.057047 | N                              | -0.654897 | 14.265660 | 2.135132 |
| C                           | -1.688317 | 15.156682 | 2.481052 | C                              | -1.689223 | 15.107176 | 2.491811 |
| P                           | 1.092540  | 12.378851 | 2.991875 | P                              | 1.380438  | 12.608680 | 3.309299 |
| H                           | 1.186187  | 12.155938 | 4.398923 | H                              | 0.562362  | 11.430849 | 3.216697 |
| C                           | -0.325662 | 13.986433 | 0.696331 | C                              | -0.225548 | 14.006049 | 0.771238 |
| C                           | -0.545286 | 13.741350 | 5.601744 | C                              | -0.564866 | 13.851965 | 5.684689 |
| H                           | 0.750065  | 14.192636 | 0.564924 | H                              | 0.023236  | 14.951406 | 0.267033 |
| H                           | -0.907117 | 14.621966 | 0.015813 | H                              | -1.019911 | 13.487800 | 0.213132 |
| H                           | -0.495310 | 12.925592 | 0.445676 | H                              | 0.666039  | 13.362019 | 0.847603 |
| H                           | -2.247610 | 15.771157 | 1.781892 | H                              | -2.266688 | 15.663994 | 1.759434 |
| H                           | -0.737707 | 12.665381 | 5.744192 | H                              | -1.426137 | 13.303483 | 6.095109 |
| H                           | -1.196879 | 14.316715 | 6.272388 | H                              | -0.391581 | 14.762980 | 6.276169 |
| H                           | 0.507524  | 13.935620 | 5.864270 | H                              | 0.331465  | 13.210034 | 5.691460 |
| H                           | -2.360258 | 15.622550 | 4.547194 | H                              | -2.458187 | 15.576975 | 4.530859 |

  

| (MeNHB-PH) <sup>-</sup> (E = -633.795426) |           |           |          | (MeNHB-PH) <sup>-</sup> TS (E = -633.786960) |           |           |          |
|-------------------------------------------|-----------|-----------|----------|----------------------------------------------|-----------|-----------|----------|
| C                                         | -1.683226 | 15.078987 | 3.837626 | C                                            | -1.751408 | 15.054585 | 3.859984 |
| N                                         | -0.781243 | 14.118590 | 4.292488 | N                                            | -0.744620 | 14.230747 | 4.346945 |
| B                                         | -0.093261 | 13.495217 | 3.142072 | B                                            | 0.000854  | 13.624986 | 3.235913 |
| N                                         | -0.714291 | 14.208267 | 2.006374 | N                                            | -0.686888 | 14.207976 | 2.076516 |
| C                                         | -1.653362 | 15.121673 | 2.476473 | C                                            | -1.716701 | 15.040896 | 2.495073 |
| P                                         | 1.178047  | 12.129855 | 3.012588 | P                                            | 1.538041  | 12.490184 | 3.286415 |
| H                                         | 1.582856  | 12.184917 | 4.398172 | H                                            | 0.743988  | 11.280272 | 3.278186 |
| C                                         | -0.435221 | 14.002339 | 0.618503 | C                                            | -0.376955 | 13.958231 | 0.696528 |
| C                                         | -0.602833 | 13.810094 | 5.677792 | C                                            | -0.505341 | 14.008882 | 5.745632 |
| H                                         | 0.576792  | 13.572739 | 0.523986 | H                                            | 0.501496  | 13.287984 | 0.690180 |
| H                                         | -0.467319 | 14.952679 | 0.048840 | H                                            | -0.130374 | 14.888722 | 0.145493 |
| H                                         | -1.139659 | 13.298592 | 0.123545 | H                                            | -1.212398 | 13.465488 | 0.157993 |
| H                                         | -2.234878 | 15.756291 | 1.805568 | H                                            | -2.360428 | 15.576808 | 1.795746 |
| H                                         | -0.198585 | 12.788370 | 5.762961 | H                                            | 0.371123  | 13.339096 | 5.810042 |
| H                                         | -1.561598 | 13.855420 | 6.232076 | H                                            | -1.367455 | 13.526917 | 6.250853 |
| H                                         | 0.108570  | 14.489439 | 6.196792 | H                                            | -0.286277 | 14.950317 | 6.289660 |
| H                                         | -2.293693 | 15.672710 | 4.520114 | H                                            | -2.429561 | 15.604089 | 4.514812 |

## References

- 1 M. Cicač-Hudi, J. Bender, S. H. Schlindwein, M. Bispinghoff, M. Nieger, H. Grützmacher and D. Gudat, *Eur. J. Inorg. Chem.*, 2016, 649.
- 2 D. Herrmannsdörfer, M. Kaaz, O. Puntigam, J. Bender, M. Nieger and D. Gudat, *Eur. J. Inorg. Chem.*, 2015, 4819.
- 3 R. H. Harris, E. D. Becher, S. M. Cabral de Menezes, R. Goodfellow, P. Granger, *Concepts Magn. Reson.*, 2002, **14**, 326.
- 4 G. M. Sheldrick, *Acta Cryst.* 2008, **A64**, 112.
- 5 M. Cicač-Hudi, C. M. Feil, N. Birchall, M. Nieger and D. Gudat, *Dalton Trans.*, 2020, **49**, 17401.
- 6 Gaussian 16, Revision C.01, M. J. Frisch, G. W. Trucks, H. B. Schlegel, G. E. Scuseria, M. A. Robb, J. R. Cheeseman, G. Scalmani, V. Barone, G. A. Petersson, H. Nakatsuji, X. Li, M. Caricato, A. V. Marenich, J. Bloino, B. G. Janesko, R. Gomperts, B. Mennucci, H. P. Hratchian, J. V. Ortiz, A. F. Izmaylov, J. L. Sonnenberg, D. Williams-Young, F. Ding, F. Lipparini, F. Egidi, J. Goings, B. Peng, A. Petrone, T. Henderson, D. Ranasinghe, V. G. Zakrzewski, J. Gao, N. Rega, G. Zheng, W. Liang, M. Hada, M. Ehara, K. Toyota, R. Fukuda, J. Hasegawa, M. Ishida, T. Nakajima, Y. Honda, O. Kitao, H. Nakai, T. Vreven, K. Throssell, J. A. Montgomery, Jr., J. E. Peralta, F. Ogliaro, M. J. Bearpark, J. J. Heyd, E. N. Brothers, K. N. Kudin, V. N. Staroverov, T. A. Keith, R. Kobayashi, J. Normand, K. Raghavachari, A. P. Rendell, J. C. Burant, S. S. Iyengar, J. Tomasi, M. Cossi, J. M. Millam, M. Klene, C. Adamo, R. Cammi, J. W. Ochterski, R. L. Martin, K. Morokuma, O. Farkas, J. B. Foresman, and D. J. Fox, Gaussian, Inc., Wallingford CT, 2016.
- 7 A. D. Becke, *J. Chem. Phys.*, 1993, **98**, 5648.
- 8 F. Weigend, R. Ahlrichs, *Phys. Chem. Chem. Phys.* 2005, **7**, 3297.
- 9 S. Grimme, S. Ehrlich, L. Goerigk, *J. Comp. Chem.* 2011, **32**, 1456.
- 10 NBO 6.0 [version NBO 6.0.18a (11-Mar-2018)]. E. D. Glendening, J. K. Badenhoop, A. E. Reed, J. E. Carpenter, J. A. Bohmann, C. M. Morales, C. R. Landis and F. Weinhold (Theoretical Chemistry Institute, University of Wisconsin, Madison, WI, 2013); <http://nbo6.chem.wisc.edu/>
- 11 G. Schaftenaar, J. H. Noordik, *J. Comput.-Aided Mol. Des.*, 2000, **14**, 123.
